# Supplementary material for: Unraveling the Sclerotinia Basal Stalk Rot Resistance Derived From Wild Helianthus argophyllus Using a High-Density Single Nucleotide Polymorphism Linkage Map
Source: Front Plant Sci. 2021 Feb 3;11:617920. doi: 10.3389/fpls.2020.617920 (PMC7886805; doi:10.3389/fpls.2020.617920)
Supplement: Supplementary Table 1 — Flanking sequences (400 bp) of significant SNPs associated with BSR resistance detected in the HA 89/H. argophyllus advanced backcross population. [file Table_1.XLSX]

## Sheet: Sheet1
Table S1. Flanking sequences (400 bp) of significant SNPs associated with BSR resistance detected in the HA 89/H. argophyllus advanced backcross population
QTL	Sig. SNPs	alleles	chrom	pos	flanking region	400 bp flanking sequence
Qbsr-2.1	C2_157528095	A/G	2	157528095	HanXRQChr02:157527895..157528295	AGATATGTTGTGACTAAATAAGAGTTCTAGACAACTCTATCCTTTTTATGTCAAATACATAATACTCCGTATGCAAGATTTAGACGAGTGTATAATACGCAAAGGCATAGGCCAAGGCCGGCCTTAGCCAACCCAATGCATAAGTCTTCTAACAACTTCATTCCAACACAGCTAACAGCCCACGACATCAGCCCAATAGA[A/G]CATCAAGTCCACTTGCACAGGTCTTTTAGTCCAGTCCATGCTTCCTTAATGCATATTGTACCTGACACAAAAGCAAACATACCTTAAACATCAATTAAACATTAATACAAAAATCATATATAAATTATAATATATGTGTAACAACATAAGTGTGACTCATTTCATGTTAGTCATTGAGATAAATTTGATATTAT…
	C2_174979149	A/T	2	174979149	HanXRQChr02:174978949..174979349	TAATCTTGCATAGGGCTCATCTCTTTGTTGTAACATAATCCCCATGCTGTGGGCCCTCCGGTCACCACTCCGTATCCACCTAAACCATTTTCAATAACAAAAATCATGTTATATTCCCATTTACGCCCCGCTTGCGGTATGCGCATATAATGTATGTATGTGTGGGCCATTGGGGGGCAAAAGTGAAAGTGCGCTAATTT[T/A]AATGTTATTTTACTAATTTCGTGAAAATAACGTTAAAAGCTGAGGACGGTTAATCATGCATCATGTGGTGGCATTGATAGCTGAAAGACAAAAGGGTACATGCACTAATCGGTCTTTGTCCCGATTGCTGAGTGTTATGTGCCTTATGTCCAAGGCTTGATGCAAAACTACTATCGAGCCGGGGGTCTCACTGG…
Qbsr-2.2	C2_141062679	T/C	2	141062679	HanXRQChr02:141062479..141062879	ATTCTTCCTACTCAGGCACATGCATCTGAACCGGCTTGCTCATGCACCAACCCCTATCTTCTATGGGGGATGGGTGTACCACCTCTTCAAGCACTTCACGCGCATACCTAGGTCTTTCGAAAGGAGCCCATGGTTAGGACGGGTTGATGTGCACATTTGTCGCGCCATGAACCTAATCTATGAAGCGGAAGACGGATCGG[T/C]AAGCTTTCAGAGGATGCAAGGCCATGCATGGAACCCGCAAGAGGCGCTAGTCCTTCACGCTCCACCTCCCCAATACCAGTACCAACCCCACGGTGAACCGGGCCAGTCCTCCTTGCCAGGAGGTGGTTTTCCTAACTTTCAGAGTTTACATGATCTTTTGCAGGAAAACCTTATGTGCACCAGGAACACCTACA…
	C2_107610652	T/A	2	107610652	HanXRQChr02:107610452..107610852	CCTCCTCATGCATACATACACAATTTTCAATAGTTTCAACGCCCCTAGTGAAGTTTGTAAAATGTGCATCAAAGTACTTGATATAACCCAAGCAATCACATCCCTGAGAATACCAATATTATAAGTATAAACACATTATATAGCATATACTTCAAATTGACCAACCATCTAACAAATTCACTAAAGTAGACCTTTTTAAG[T/A]GAGTGGGCGTTTTTCCCGAGGCCATCTTCGCCTGCATCAAATGCATTCTTTCTTTAATGAGTATCGTTTGGATCACCATACGGCACAACCATCTCAACAAAGCTCAATCTATGAGCTATGGGTCTTCGGCCTCGACTACCATCAACATATGCAACAGAATGAATTACTAAACCCTCCCTTGGAGTGAACCCAAT…
Qbsr-5.1	C5_44061240	T/A	5	44061240	HanXRQChr05:44061040..44061440	TGATCTTGAGTTGGGTGCAGTTGTCTTCGCTCTCAAAATCTGGAGACACTATTTGTATGGCACAAAATGCATGGTTTTCACTGACCACAAAAGTATTCAGCATATCTTCAATCGGAAAGAACTCAACATGAGGCAAAGGCATTGGGTAGAGCTTCTAAACGACTATGATTGCGAAATTCGCTACCATCCTGGTAAAGAGA[T/A]TGTTGTGGCTGATGCATTGAGTCGTAAAGAACATATATTGTGTTCATGTTCAATCTGATGTTCAAGCTCGATCCAATATTCAAGCACACATTTCTCAGGCTCAATATGCTTGTGTTTCACAAGACTTGATGGGTAAGGAATTACCCTGTCACATTAAGCCTGATCTTGTTCTGAAGGAAGATGGATCGTATTAT…
	C5_55959009	C/T	5	55959009	HanXRQChr05:55958809..55959209	GTTGATTAGAGCTGAATTATTGTTGAAATATGTAAAATTCAGCATTTAAAGTGTGTTTCGGGTGCTTTTTAATGCATCGTTTAGCTTCCGGAAAGTTTATATGTTAACCCTTGTATCCACACTTGGGTTTTAATGTATTTTAGACGTTGGACCTACTCCTAGGCCCTAATTCCATTATCTGACTGCTTTCTGCAGAGTTG[C/T]TAACACAGCGTGTCTTACCAGTGAGTTTACTAGTCTTTCTGACGCAACGCTAACAGTAATGCATAAATCAATATTTGAAGTATAAAACGTGCATGAATTCACATGTATAGTATGTAATCAGACAATGTTGACATTTAAGCACATAATTGCAGATATTAAGTAATAATTAAATTGTACGGAAATTACCGGTTTTG…
Qbsr-6.1	C6_6832430	C/G	6	6832430	HanXRQChr06:6832230..6832630	CATCGGTATGGTTTCTCTAATGAAATTCTCATTCATTCTTTGCTCCTCTTCACTAACCTTCTTTTCTATAACTGCATTTACACAAAAAAAAAAAAAAAAAAAAAAAAAAAAAAAAAAAAACTATGTTACGGTAACAAAAACCGACAAACAAAAAACACAAAGTTAATGAACTCCTAACAACCTGGATTAAGGTTGTTCGT[C/G]TTGAATCTTCCACGAACATTCATCGACGTTATGCATAGTATCTTAACGAAGTTGTATAGCCCATCACCGAGGATAAGAGCGATAGAAATAAACGCCTGCCAACCCAAGAAACAATAACAACTAAGTATGTCGAATGTAGCGGAATAATTAAGAAAACTAAACTAGCATCACCTTGTAACCGTTGAGGCTTTTCA…
	C6_5701209	T/C	6	5701209	HanXRQChr06:5701009..5701409	AAACAAACCTATTGCAACTTTTCACGATGTTGCAACTCTCCCATCAAAGAATGTAACACATTGCAACTTCTCAAGATGTTGCAACAATTATATTGCAACATCGATATTGAAATGTTGATGTGTGATGGCCAACATCATTGAAACAACGATGTTGGAACAATGATACAGGAACGATAACATGTAAACAGAATCATCAAACA[T/C]TCGAACAAAGAAGTGTAATCGGAGAATAGCGGCTGAATCACGAGAAACATGCATTTGAGAGAGAAAGAGACACGCTTGCAGATATCAGCGAGAGAGATTTGAATGTGGAGCCAGATAATTATGTCTTATTTATAGAATTTTGAATATGGTTTGAATTTTGAATGTGGAGCCAGAATTTGAATTGGGAACAAATG…
Qbsr-6.2	C6_78289542	C/T	6	78289542	HanXRQChr06:78289342..78289742	GGTCATCTTGTGCGATCATGCATTAATAGATTGTACTATGAGTTGTAACAGTTGTACCGTAGCAGTTTCTAACTTGTGCGACTAGTTCTTGTGCGACCAAGAACTTATGCGATCGGCTCTTGTGCGACCAGATCATCAAGGAACTGATCTTGTGCGATCAGTTATGTTTTTCCTAAATTCATGTAATTAGTTACACTTAC[C/T]CGATTCACCCAAACAGTTTCCATCTATGCATTTATCGATCAAATCAATAAATTATCAATTACTTCATATGGATTCCAACTAACCTCTCATCATGATCATAATCTAGCATAACATTCAATTCACATAATCAATCAACGATTTCCGAATAATAACAAACAACCCGAGTTCTTGTGTAACATTAAGCCGGTAATACA…
	C6_83474175	G/A	6	83474175	HanXRQChr06:83473975..83474375	AACACTTTCATTCTTGAAATCTTCTTTTGCTCCATCTCTTGAGCTTCAAGTTTTTCAATGAATTTGCTCAAAGTTAAATTGCTAAACCCTTTCTTATTTCTCAACATCATCAAGTATGTGCCCCAAGTCTCATGTGGCAATGCATCAGCCAGTTTCTCAATCAACTCTTCATTATCTTTGTTGATGCTAACCCTCTTCAG[G/A]TTTACCAACAGATTGTAGTATCTTTCAATTATTTGCTTTGTGCTTTCATTTTTCAACCAATGGAATAGATCAAACTATTTTTTCAGAAGCAATTTCTTGTTCTTGATCATTTCTTGACTTCCAACAAACTTGGATCGTAATGCTTTCCAAATCGAATATGCAGTCCCACTTTGTTGCAATAAGACTAATATATC…
Qbsr-6.3	C6_5702968	T/A	6	5702968	HanXRQChr06:5702768..5703168	TGTTTGCTTTGGGCGTTTTGAGCTTATAGCTTATGTTTTAAGGCTAGTAGACCATGCATTCCCAAAGGAGTAGATTGATTGTCGAACAAAAGTTCAACACCACAAGATTCATTGTTTATATCATGCAAACGTTGAGGAAAGTGTATAGAGGCAAGATTTGTATCAGCGTTAGTATCCAACAAGTGACATAATGCATATAA[T/A]ATTGTCTTGTTTGAGTACATGTCGCAGTCTAGTACTAGAAAGATTGGTGCATTTGTTATGACAGCAGATAGGCGAATCTATAAAATGGAACACGCGTGTCGTGTTGAAAGTACGTATTCGTTCGCGATATATTAGATAAGGATATGAGGTAAGTGATGCATACCAAGGTGACACCTGCCTAAAATGATGAATTG…
	C6_6001429	T/C	6	6001429	HanXRQChr06:6001229..6001629	AACAAACAAAACTCGCTAGTGAAGTTCAAGTCAATTATGTTTTCGGTTGGCCAAGGTGGGTTTTTTGTTAACTTCGTCTACCTTTTCGTATTTAAAGAAATGCCAATGGGAAGACCAAGGGTTGCCTGTTTCATTTTCGCGCTTTTTTTTAGCAGCCAACTAAATCACCGGACAAACATCTTGAGATGCCCTCAATCGAG[T/C]AAATGCATCCCCACCTCCATAATGGCCAGAGATGGATGCATACCCAAGCCATCAAGCCACCAGTTCCAGGGAAAACCCGCCAGCCCGAAGACCCACTGCAATAAAACACGATTTGGCTCGGTTTCGAATTGGTGATCTCCAGACAGGCCTAGTTCTAAATTTCATTGCCACCATCAATGTCCTTCAAAATGAAT…
Qbsr-7.1	C7_56631029	G/A	7	56631029	HanXRQChr07:56630829..56631229	TGTTATCTGGTATATGAGATTGAAGACGTCCACCCTACGATTTGCAATTGCAATTTGGAACACCCCATGTTTGTTCTCATTCACTAGAGAAAGTGCATTTGGAAAGGAAAGTAATATCTCTTCAACAACCTCAACGTTCCCCATAGTTGCTGCTGCCTCTAACGGACTTCCGATAAGATCTCTTACCCTTTTACCATCCA[G/A]TTTTGCTATTTCAGAGCAAATAAATCTAAGGAGTTGAAGAGCTTGGGCATGCATCACTTTTTTCTCTTGAATCTTTTTTATCTCTGGCACTGCATTTCATAAATCATTATGTTCCTTTTATCAAAGTATCTATTTAATACCGTTGTTTATTAGATGAAATTGGCTAAAAGTGGAAACACTCGCACAAAACATTT…
	C7_33687882	T/A	7	33687882	HanXRQChr07:33687682..33688082	ATTAGATGGGTCGTGCTTTGTTATGAAAACTATACCAAACAGTTAGTGTAATTGTAATATGTGATCAATTTTGTGATGTGCCATACTATGATGTCAATTGAAACTGTGAAGTTGTTTTACGAACCAATACGTGTGCTGAATGACTAGAGTGTTTCATGAGATTATATGCATAGTATGCAAGGTGTTAACTATGTGATTTA[T/A]GTGTACGTGAACTGATGTTGATGGTAACCACTAGGGGAAACATGAACTTGTGTTATAAACTTGCATGAGATCTAAATGCTTGCTATGTGTTATGTGACAAAGGTATTACGTGTGACTTGTTGTATAGGTGAATTGGATACGCGTTTACGAAACTAACTACTCTTGGTAACCACGGTAGGGTTGGTTGACTAACT…
Qbsr-7.2	C7_62465916	T/C	7	62465916	HanXRQChr07:62465716..62466116	ACCACCGGGCTTTCCGGATCCCGTAGTGTCTAGGAATAACTCGATGTACCCTGAAAGAAGTTACTACAATCACAATCATCCAGTTGAAACGATGCATGGTACTGTTAACGAGAAGAAGTATTACAGCATGCCGGATATCTCCGGGCTCTCGCTTGGCCCGAAAATGAATGGGCTGTCAATGTACTCTGGTCCCTCTGGCC[T/C]GTCGTATGCATCCGGGTCCCCTTTGGGCTATGTCGGTGCACACCAGTTGAGTTCAGGGTCGGATACATGGTCCATTTGGTCTAGAAACCCTTTAGAACAATTTGGTGTGGCCGAAAAAGCGAATAACAGTAGGCTGAGTTTGAATTTGAACACTCAAGATACTGGTTCTACGGTTGATTTAGAAGCGAATCTTT…
	C7_62041373	G/A	7	62041373	HanXRQChr07:62041173..62041573	GTATTGAATGTGGGTTCCATTCACGGGTATGCATACCCACTTAGGGTAGTTGTGGTGAGCGTGTGGGATTGGTGGATAGAGTAAAGGGGTGAGCCCTTGGTTCTAGGGTAACTTTCGGTTTAGTTTCAGTAATGTTTGAAGTATGTGTCATCCCACTCGCAATTTATATGATTTGTAAAGATCGTGTATCATGTGGTGAT[G/A]GATTCGTTGAACTTTGAGTAGTGTGGATGCATTCTTTATCATCAACTTGGTTTTGATATTACATGAGCTTTGGAATTTATAGAGTGTTTACATGTGATTAAGAACAAAAACTTATTTACCGTGAGCAATTTCATAGAATAGTACAAAAAGGTTTCCGAAATACAATTATATGTTGAATTAGAGACGTCAGAACC…
Qbsr-7.3	C7_62500940	T/C	7	62500940	HanXRQChr07:62500740..62501140	GGTCGGTTACAGACCGCAAGACCAGGAGCTTACGCTCCGCAAGAGGTGCTTACGGACCGCAAGGCTTCTTGCTTACGGTCCGTAAGACTGTTGCTGGCAGCAGAAAATGGACAGCTGCCTGTTTAGCCTGTTACACCGCCTCATTTGCATGGTATTGGAATACAGGAGTGTGGCCAACAGTTTTGCATGCATAGGGACAC[T/C]TGGGGATGATCAGGGATCACTTTTAGACTATGTTGGCATGATCTTGAGCTCTTAGGACCACTATATAAGGAGGTTGAGTTGCAACCATTTTGTTTGCTCATTCCAAACTCACCTCAAGGTTTTCTCTGAAGTTCCTGGAGCTCAAGCTACTTCTATTAAGTTGTCTAATCTTGCTTAGGACCTTTGTAAGTGTC…
	C7_86188878	G/A	7	86188878	HanXRQChr07:86188678..86189078	TCTATTATTTTTATTCTATTATATATAAGAAAGGTAGTTTAATTGTTTTATTATGTTATGTAATGTAATATTTCATCCCTCTATTCTAGTTAGGTATGCATCCGTCAATGATGTTGTAGCCCAGTGGTTGTAATGGAGGTGAGAAGGTTTATCACTTTGTGGGTTCCTGCTTGGGAGTGCTCAGGTTCGAATCCCATTTT[G/A]ACTGAGCTTTGGTCATGTATAGCTCGAATCGAGATACTCTTAAAAAAGGTTAGGTATGCATCCCTCTATTCTAGTTAGGTATATAAAGATGATTTGATTTTCTTGTCTTACTCTCATAGCATAGGGTCCTTCAATTCTAGGTAAAAGATTACATTACATTTACATGACCTAATAATGAAGAAGACAAAGCTTGT…
Qbsr-8.1	C8_55328277	G/A	8	55328277	HanXRQChr08:55328077..55328477	AGAGTCACTGATTTCTGATGTTTATGATGTGACCGCAAATGCAGCTTCTGTTATTGATGTCTACATGCTAGGAGAGGCAGAATCCTCTGCTGTTGATGGAGATAGTTTGAATCCACAGGTATGCTTATACTGCTATATGAACATGTAATGCCATATTAGCCGTTAACTGCATTCGCATTCGAGTTTATATTTAATAGTAT[G/A]ACATTGCATATATATGTTGGTACACCAATAACCAATATCATACTTGTATGCATTCAACCAGATTGAAACACCAATTTCAGTCTACTGAAAATTCGGTGGTTTACTAAATTAAGTCACCAAATTCATGTTCTTGATTATCGCTAAAATCAGTTAGTTTTCGTATCTCTTTTCAAGAAGTTACAATTCGGCCTCGA…
	C8_66678828	A/G	8	66678828	HanXRQChr08:66678628..66679028	AAAGCTCTTGTGTCCTTGGACGACCTCGGTATCTTACCAACACTATACTACGTCCACGATGGGTGCACTTGCCCATATGTGTGTTTAGTGTTAGTAAATATCGTGTTTTATAAATTTAAAACTTGGCTAAAAGTGTAAAAAGGGGCTTAAATACTCATCAAAATTATAACACACTTCACGCACGTCAGATATTCATGCAT[A/G]CGTAATCAGTTTCACATTCGCAAGGTTCACGTATAAATACAAATCACAGTGGGTACTCAATCAGTGATCACCAAATAGCACATAGCAGTTAAACAACTTGTTCAAATTCACAGTTCAGATGTATGCTTCGTAACAGTACTTAATAGTCAAGTATGCTAATCAACACCGAATCATGTTTCTTCATGCATAACTGA…
Qbsr-8.2	C8_65495308	C/T	8	65495308	HanXRQChr08:65495108..65495508	TTTTGATCATTACCGTTTTCATCCATCTACTCAATCATTTTCAAAAGTTTGTTGACGATATTTTCACAAGGCTCTCTTCATAATGGAAAAATTTGGGTTTCAAGTGATTGTTGACGAGATTTTCACAAGCCTCTCTGCAGAAGATATTGGCCGTTTCAAATGTCTTTCCAAGAATTTTTATAGCGAATTGTCAAGTCACA[C/T]ATTTCAGATGATGCATGCTCTCCGAAGTGGAGATTCAGTACAAAAGAAACTACTATCCTTTAAAGACACGTCAATTGTCATTGACGACGTAGTTGCTGGTACTTTGGATGTTGTTAGAAGCAAAACCTTAAGTTTTCCTAACAATGTCCACCCTAGCAACTTACGTATTCTATCGTCATTTAATGGTTTGTTGT…
	C8_71401840	G/A	8	71401840	HanXRQChr08:71401640..71402040	TACATCCTAATGCATTCCAACTACAAAACCTAGCCATAAACATCCACCCCCACATACAACCTAAACACGTATTCGTGTCTACCCATACCCATACATGGTTTTCATCTACTATCATACCATTAAAGCCATACGTACCTTGCTTACAATACATCCATACATATATATTGAATCCAAATACGTGCATACATACCATTCTATCC[G/A]CACGCATACATGCATATTTTACACGTACACACCTACATACATATAGATGACTCGTTTGATTATCTCTATAGAGTCAACTGGCTCTTTAAGCCAAAACCTTGACTCATTTGAATCTTTCAAAAGAGTCAGTTGGCTCTTTAAGCCAAAATTCTGACTCATTCGAATATCTCGAATGAGTTAGCTGGATCTTTAAG…
Qbsr-9.2	C9_176724553	G/A	9	176724553	HanXRQChr09:176724353..176724753	CTCTATCGCTACATTCACAGGCTCCTCACCTACTCTCTTAGCCAACGTCACGACAGTAGTGGCATTGTAGGGTTGAAAGATTTGGTTGTCCTTCACTGTATCCACAACCGGAAGCCTCTCGATGTTCCATATCTCCTGTTACGAAACATGCATCTCAACCGCCTTGCTCGTGCTCCAACACCTATTTTCTTTGGAGGATG[G/A]GTGTACCGCCTCTTCAAGCACTTCACGCGAATTCCAAGGTCCTTTGAAAGAAGTCCATGGTCGGGACAAGTTGACTATCACATTTGCCGAGCCATGAACTTACTCTATGAGGTGGAAGACGGGTCAGTGAGCTTCCAAAGGACGCAAGGCTATGCATGGAACCCGCAGGAGGCCCTAGTTCTTCACGCACCACC…
	C9_176603426	G/A	9	176603426	HanXRQChr09:176603226..176603626	ATCACACACGTTTTATTCAATACCTCGCGACGCTTTTGTTTATATCATCTTACATACTCAAATTTCTTAAACGTTTTATATGCCTAAATTTGTTATGTTTTGACACATACCATATACGTAATTTTTTTTTATTTATTTGTACCTACGCTCATATTCATACTTTTTATGCTTATATTTTCATTCATACTCATGATACATAC[G/A]TTCGTACCCGTACGCGAGTGGAATCCGAGGGATTCGCTTACGTGGGTCCCATGCATACTTAAGTATGGACTTGCTTAGATACCACATTCTTACACGTACACATTCTAATTTTTTTTTAAATTATGTATACCCTAATTCATACATAACTAGTACAAGTTATGCGGATTATGCGACGATCAATATAATCGCGGGTG…
Qbsr-9.3	C9_110189180	G/A	9	110189180	HanXRQChr09:110188980..110189380	CCCCCTATCTGATTTACTGCGAATACGCTATGTTCGACATTCCATGGTAATGTCAACTAACAACCGGTCATCTCATGAAACCCCAGGTAAAGTCCTTAGGTTTCTTTAATTGAAATTTCGACTTTCACATTTACTGAGTAGATTTTCATATCTCTACTCCTCTTAATGGTCATTGTGTCACGATCATTTCTTTCATTATA[G/A]CGAATATTCATTGCTTCGTTTCTTGAAAATTCATATGTTACGCATGCATCGTTTGTTGCGCATGGGGTTTCGTTTCAAATAAGCGTTTCATCAAAATTCAAATATTATTTTCGCTAAATCTAATTATGGATTTGTGATTCGAATGACCCGCATTATTGTAACTGTTATCTCCTTTGTATTCAAGTCAACACATT…
	C9_173918742	G/A	9	173918742	HanXRQChr09:173918542..173918942	AATGCATGACACAAGTTAAATAGTGAATTCAAGATTTATTTGAGAAACTGCCATGATAATGATGACCATTGAACTCAATACATAGTTGACTGCCCATATGCTTTGAATTGAAAGGCCCAGTAATCACCAACCTACTATAAAAGTTGTCGGCCATTAAACATTAATTCAATTAGTGATACATTGCATGTGATGGATTAAAT[G/A]TTAGTATGTAGTTGATGTAGGGGTCCAATGAAAAGTGGGTTATGCATTTGGTGGTCCAATCATGTGATTTTGGGCGGCCAACATATACTAGGTGGGGTTTGGGCGGCCAAGCAAGGGTATTGGCTGGGTTTTCGGCCCAATGGTTATTTTCGGCTCAACTTTTAATCTCTTAAGTTGTTAGATCTGTTAACCTT…
Qbsr-10.2	C10_180847742	G/A	10	180847742	HanXRQChr10:180847542..180847942	CATGCAACCTGATTTATCATTAATATAACTTGGTAATTAATGTAAGAACATGTCTAAACATGTTCAACCCGACAATTTTCAGTTTAGGTCCGGTTCGGAACCGAAAGTCGCATAGTTTGACTTATACTTTGACTTTCAGTTCTGATCCGTTTAAGCCTAGTTTAGGATTGCCTTAGAGCTTCTTTTGGACCTAGTTACAT[G/A]TTAGTATAACCCTCTGTGATTATACAACTTGGTTCAATAGATATCCGATTCATATGCATGTTTCCGTTAATTGCTTAAATGTTGACTATTATGCCCTTTCCACCTTAATATGTGATTTTTGAAAAAGTAAAAGAATAGACACCTTATTTACTGATCTATAAACATGTACCCAAAAATTGACATCGGTTTGAGGT…
	C10_111029421	C/T	10	111029421	HanXRQChr10:111029221..111029621	TGTAGCCTCTTGTTATGTTATCCGATTGATGCATTTAGGACCTAAAGATCATAATCATGTATGTGTTGTTTGCTATGATTATCCGGTTAGATATTGGAGTTTGATTTAAATCATTGCTAGTTGTAAGGATATGTTTCGGTTTATGTTGTTGGTATGTGTTGTATATGATGATGGTTATGAAATCCTTGTTCATGCTTGAA[C/T]GGTTTGTTATCGGTTAGTAATGAGGATCTGGTTAGGGTGTCGAATGCATAATTTAGGATGGTTGATGATTTTGGTGATGAATATTGTTTGATTATCGTTCGTGTAAATGATGAACAGTTTGAAGATGGTTTGTATATTCAAAAATATGTGTGTTTGATCCATTTTAGACAAGGGTTAGGCAAGAAAACATGTTT…
Qbsr-11.2	C11_26402705	T/C	11	26402705	HanXRQChr11:26402505..26402905	GAAAAACAGTTTAGTCGCTTACTTATGGGGTAGCTCCCCAGGGCATGTATAAACGAGTTAATTAACTGCTTAAACAAGTTTTTGGAATTAAAACTGGAAAACGGCAAACACGTGAACTCGCCAACGTTATGTTGACACTCTACTGCATGCTTTGCAGGTTGCTCGATACAGCTTTGGACGGACGTTGCAATCGGATGGAG[T/C]GCGTGGTTCGTAAGTAACATGTTAATAAACTTGTGGTTTCAATTATGATGCATTTTCTTCCCCTTTCCGCTGTGAACTTAAAACTATGTTTCGAAAAATTTAAATTAGGTCACTAATTATGCTAATGTTTTTAACAATAACTAATCCGTTCAAAATAATTAGTGGCTAAGATCCTGGTCGTCACACGCCTCGTG…
	C11_39839617	C/T	11	39839617	HanXRQChr11:39839417..39839817	TTCTCCACTTTTACTACCTTTTATAACATGATTCATACCCAATTTGAACGAAAAATAAAACAGTTTCAGTGCGACAATGGAAAGGAATATAATAATAACATGTTTCACCATTTTTGCAAATTAAACGGTATGCACTTTCGTTTTTCGTGCCCATATACCTCCTCTCAAAACGGAAAAGCCGAACGAAAGATTAGATCCAT[T/C]AATAATATTATTCGAACCCTTCTCGCCCATTCTTCTTTACCCAACACATATTGGCATCATGCATTGGAAGTTGCCACCTACCTACACAATATTCTTCCTACCAAAACCCTTTCCAATATTTCTCCCACTCAGAAACTATATAAACACATCCCCTCCTATTCGCATCTTCGTGTTTTTGGATGCTTGTGCTACCC…
Qbsr-14.1	C14_38960647	G/A	14	38960647	HanXRQChr14:38960447..38960847	TCCAATATCGAATACATGATTTAATTACTATTTTGATCATTGCTGTGCACATGGAATTCAGATTGTATTAATAGGAATATGTTGATGAATTGATACCTTGATTTGGAACTTCCATAATATTCGATTTAAATATGATTAAATATTGTTAGCGGTGATTGTTGCAAAAGTTAAAGAATTAAGTTCTAGAATGAGTAACAGTT[G/A]ACACGTTGCCAAAATTGAGATTATGATAATAATATAAGTCATGCATATAAATATAAGTCATGCATATAATTGGACTATGAGATTGTACTACACACATAACAGAACCGAACTTGGGCTGTTCTGCTTAGAGCTGGGCCACAAGTTTAATTTTTCGCATAAAAAGGGGGACCGGTTCTTATACCTCGGTTGAATCT…
	C14_92847867	C/G	14	92847867	HanXRQChr14:92847667..92848067	GCAGTGGGCTTTTCGTATTAAGGCGCAATGTGATTACAAGTTTTTTTATATATCACATAGGTTTTTAGCATCCCTTTTCCAAAATATAGCTATAAATAAGGTTTATATATAACTATAACTTTACCTACATGTACAAGCCAAAAAACCTATTGAACAACAGTACAACACTTTGATGCATAAAAACACTCAAAGTACAGAAG[C/G]GTGCGCCTCAGACCCCGAAAACTGCGCTTTTCTTGAGCTTTGTGGAAAAGGCACGCCTCGGGTGACATAAAGCGCTAATGCCTGCGCCTTGTGCCTCAGGCGTGCTTTTTAAAACCCAGCTCACTAGTGATTTGTACCATGCCATAGATAATTTCATAAGCATCCTTCTTAACACTACTAACATGCATAATCAA…
Qbsr-16.2	C16_156300872	T/G	16	156300872	HanXRQChr16:156300672..156301072	CGAACTGCAAATGCACTCTTGAATGTATTAATCGAGTACTATGAAGGAAATGAAGAACTGATCGAAAGCAAGAGAGATATGGTGCAGAAACAATACGACATGTTTTGCGGAGTTCGTGGAGAAAGTCTTTCTGATCACATTAGTCGCTTCTTGAACATGATGACCAAAATAAAGAAGGCATGAAATCCTGTTACAAATCG[T/G]GCTGCAATAAAGAAGCTGCTTGATTCACTCCCCAAGGAATGGAGCCTACAATGCATGATGATCAAGAAGGATTTCCTCAACAATCCTAATCCTGTCACTCTGTCAGATCTGATCAACACCCTAAGAGCTTTTGAAATGGACGTCAACAAAAGAGAGATGAACACTGCTGGATATCAACCTAAGTCAACTCAAAC…
	C16_146472171	G/A	16	146472171	HanXRQChr16:146471971..146472371	TAAGATTGATAAATATCTAGATGTAGTGCAAATTAAGAGATGGTTGTAGCTTGTGGAGGAAGAAATATTGTGTGTGAAATGAAATCTGGCCGGAATTTGGTGGATAAGTTTTGTAGCGGCGGTGGTTGTGAAGGTGGAGATTATTTTGATGAGTGAAAATAAAAGGGAATTTAATTTAATAGGGGGAAGAGGAGGAGAGA[G/A]AAAGTGTGTGTGTGTGTGCATGCGAAGAGGAGGAAGAGGAAGAGAAGAGATGTGTGAAATGCATGCACGAATGAAGAGACTTGATTACTTGAAGACCACACATATGGAGGAAGCTTCATCAATGGAAGATCAACAAACCCTTACCCTTGTGTTTTTGTGTTTTTATAAGTTTACTTGGTTAAATGTTAAATAGT…
Qbsr-16.3	C16_154054455	C/T	16	154054455	HanXRQChr16:154054255..154054655	GTTTTATTACTTTGTTTATCAATGGATCAAGCACGTCCTAACATGGTTTATCAATAACAATCAGTTCTGTATTCACATTGGATCACGTATTTTGTCACATATTACACAAGTTACTTTCATGAATATATACACATAATATGCATGTTATAGTTGTTAGCCATGTCACACATCATTCATGTTAACAAAGTTTATCCACACAA[C/T]AGATTATTGTGCCACATACAAGTTTACTTCATAAGTCCAAGTCCCAATTAACACTTAACAGCCGGTGATCATCATGAAATCTCATAGTATGTAGTTGTTTCATTTACAAGCTCATATCACAAGTTCCTATTTCACAAGGCACGTAACAGTTGACATTCGTAAACACAGACATCCAACATTGCACACACACCGTA…
	C16_146426614	A/C	16	146426614	HanXRQChr16:146426414..146426814	ACATTCTTGGGTATTTCGTCCAAACACAGCATATTTTCATTGGATTTTAAAATGTTAGGCTGAAATTGGTTTCTAATGTAATTGGTTTTTAAGCTTCTGCAGAGGCCAAATAGTTATATGGCATTTGGGATTTTGGTCATTTATGAGGATGCATAATCCCTAATAAGTCGGTAATTTTACATACCACTTTCACTATACGA[A/C]CAACATTTTTAGGGTACTTGAGTTATTGCTATTTGCTTGGTTTTAAAGAGCGCGCGCAGAGGCTGGCGCCTTATGTAGGGTGAGGCGCGCCTAAAACTGGAAAGCAAGAAAAGTGCATTTTTGGGGATTTTCCAAGTCTGAGGCAAACGCCTTGTGTACCCGGGAGGTTTTTATGCATTAAAATGTTGTACAAT…
Qbsr-16.4	C16_75842994	T/A	16	75842994	HanXRQChr16:75842794..75843194	CGAAGGTGATAGGGTTCATCAACCGGGATGCGTAGGTGTAGTTCTCCTAAACCCAAGTTCGTTTGAGCCAGGTCTGGTCTTCATGAATGTTGACGTGCAAACCGAATGTCCGGAGGGTCAGATGGCGACGTCATGTCGAAACAGTCGTATGAATATATAGAATGCATAAAACAGTTGCCGTAGTGGGGTGAGGAGAAAAC[T/A]GGAAAATAATTTGATCACCACACGTCAAATTTCAAGTAAATAGTTGGGTGTCAAAGCGAGCACACTAGGGCTAATAAGGGCAACATGTTACTACGTTAACTATGCATACCATAAACAACGTACCAAGCAAATGTAACTAACAAGTAGGTAACATAAACATAGACCATACCATCTAAAGTGTTGAGTCTTGCACG…
	C16_63009695	C/T	16	63009695	HanXRQChr16:63009495..63009895	GCAGCACCAAGAGTACTAAGCTGAGGGACCCGCTCTACCGCTACATTCACAGGCTCCTCACCTACTCTCTTAACCAACGTCACGACAGTAGTGGTGTTGTAGGGTTGAAAGATTTGGTTGTCCTTCACTGTATCCACAACCGGAAGCCTCTCGATGTTCCATATCTCCTGTTACGAAACATGCATCTCAATCGCCTTGCT[C/T]GCGCTCCAACACCTATCTTCTTCGGGGGTGGGTGTACCGTCTTTTTAAGCATTTCACGCGAATTCCGAGGTCCTTTGAAAGAAGCCATGGTCGGGACGAGTTGACTACCACATTTGCCGGCCATGAACTTACTTTATGAGGCGGAAGACGGGACGGTGAGCTTCCAAAGGCACAAGGCTATGCATGGAACCCAC…
Qbsr-17.2	C17_99950806	T/A	17	99950806	HanXRQChr17:99950606..99951006	ACTTACAACTCGAAATGGAAACATTATCACCTGGGTGATCGTTGATGGACTCAAGTTACCAGCACTCTTTCTTGCAATCAAGGAAAACTGACGAGTCTTCACAGTTGTGAATGTTCCTCTGAGATAGGCAGCTTTTAGATACGAAGTGCTAACTCCTGTTACCTCTGAATTTGATCTATGCATGGTTTATGTCAGGCAAT[T/A]CCCAACACCCTTGGCTCACATCTAGACATGGACATTACTTATCACTGTAGGACAACCGGATAGAGTAACGAAACATCCTGACATACAAAAACATGTTACGAGCATGTGCGTGGTTAACTTTAGTAAACATTTGGGAATGACACTCATTTTTGGGTGAGCTTTACTACAGCCGTTATCGTCTTAGTATGCATACA…
	C17_68503520	G/T	17	68503520	HanXRQChr17:68503320..68503720	CAGCAAAACACAACTAACACGTGTTATAGTTTGAGCTTCAGGACATGCGTGTGTTACATGTGACGTGAAACCCATGTACAACGTAACACGTGTTAGTGCTATGTATTTTTGTTTACTAGTAATATGTAATGTGAGACTCTTGTTGTTTTCTCTAGTACACGATGTTAAAATGGTCTAGACTTAACACATTTTCTGTTGGA[G/T]GCGCCCGTATTTGTACCTCTACTGTTACAGTTACTATTGAAGTTTATGCATCCATTCTGGAAGTCCTAACACATGTTATAGTAGATGCTTAACACACGTTATATCAGGTTTACTCTATTGTTATTAAGTTACTATTGGAGTTTATTCATCCATTATGGAAGTCTTTACACACGTTGTGATAGATGCTTAACACA…
Qbsr-17.3	C17_171247454	A/T	17	171247454	HanXRQChr17:171247254..171247654	CGTTACGACTTCCATCGTAATTAACCGAACAACGCAACCGTACGACCAAACGAACTGACATCCGAGATATTTTTAATCATATTTTAAGTTCCCTATACTTTAACTTCATTTTAGAGCTTTGAAATGGGGTTAACGGGGCTTAAACGTGTCAAAAATACATTAAAAATCAAGTTTGGAGCTGCAGGGGCCTGTTTTGCCAA[A/T]TTTCAAACTTGCTGACCTGCAGGTTCCTTACGGACCGTATGGACTTCCTCTGATGGTCCGTAAGCAGGTGCCAGACAGCAAAAAATGCATTCCAGCTTGATCCAGCTGTTCCTCACTTGTGCAAATGGTTTTGGGCAATCTATGGGCTGGTTTGGGGGCTCCAATGGTTTTTCAAAACAATGGGCTCGATGTGT…
	C17_174047539	T/C	17	174047539	HanXRQChr17:174047339..174047739	ACCCATTTGAATTCACCATGCACTTTCCGTTGATTTTGAACTATAAGCAACATACTACAACATTCTTTCCCATTTACTATAAGCAACATACTACATGACACCTAACCTTCATACAACAGACTTTAATTATGTATTAAGAAGTGAGGTTCCGGAATTCACTTACCGTATGCATCCATGTTCGAGCTCGTCTTCTTGCCTTC[T/C]TTTGACTCGTTAGCCATCCGTGCTTGAGTCCTTGCCAATGTATTTTTTCATGCCATCATTTTCATAACTTGTTAGTTTGCATGTTCATCCATATCGATAATCATTTCAAATTCTTAGTTGCATTACTTTCATTAGTCAATCATTCACTAACATGCATAGCTCAATTCACTGAAAATAGCCTGTTTTAGGACGTC…
