# Supplementary material for: Unraveling the Sclerotinia Basal Stalk Rot Resistance Derived From Wild Helianthus argophyllus Using a High-Density Single Nucleotide Polymorphism Linkage Map
Source: Front Plant Sci. 2021 Feb 3;11:617920. doi: 10.3389/fpls.2020.617920 (PMC7886805; doi:10.3389/fpls.2020.617920)
Supplement: Supplementary Table 2 — Detail of sunflower linkage map developed using SNP markers in the HA 89/H. argophyllus advanced backcross population. SNP markers with red fonts are co-segregating markers. [file Table_2.XLSX]

## Sheet: Sheet1
Table S2. Detail of sunflower linkage map developed using SNP markers in the HA 89/H. argophyllus advanced backcross population
SNP markers with with red fonts are co-segregating markers.
Marker	LG	Position	HA 89 allele	Heterozygot	H. argophyllus allele	Missing (No.)	Missing (%)	X2-value	X2-Significance
C1_149762093	1	0	32	75	27	25	15.7	2.28	-
C1_22761277	1	9.324	26	84	42	7	4.4	5.05	*
C1_22761300	1	9.324	26	84	42	7	4.4	5.05	*
C1_22761301	1	9.324	26	84	42	7	4.4	5.05	*
C1_96876269	1	15.323	40	57	34	28	17.6	2.76	-
C1_19369005	1	19.335	47	70	30	12	7.5	4.27	-
C1_19369013	1	19.335	47	70	30	12	7.5	4.27	-
C1_19369015	1	19.335	47	70	30	12	7.5	4.27	-
C1_19369017	1	19.335	47	70	30	12	7.5	4.27	-
C1_122241274	1	26.3	37	72	40	10	6.3	0.29	-
C1_24091553	1	31.098	31	70	29	29	18.2	0.83	-
C1_67649691	1	33.536	36	72	35	16	10.1	0.02	-
C1_15271775	1	36.528	28	76	46	9	5.7	4.35	-
C1_15271788	1	36.528	28	76	46	9	5.7	4.35	-
C1_15271805	1	36.528	28	76	46	9	5.7	4.35	-
C1_23747928	1	37.651	32	62	46	19	11.9	4.63	*
C1_76685540	1	39.184	40	59	41	19	11.9	3.47	-
C1_76685589	1	39.184	40	59	41	19	11.9	3.47	-
C1_95532237	1	39.559	36	67	30	26	16.4	0.55	-
C1_95532251	1	39.559	36	67	30	26	16.4	0.55	-
C1_41996008	1	39.708	32	59	46	22	13.8	5.5	*
C1_53397752	1	40.929	34	72	39	14	8.8	0.35	-
C1_86794758	1	41.673	44	63	40	12	7.5	3.22	-
C1_74834115	1	42.471	38	70	33	18	11.3	0.36	-
C1_29571904	1	43.581	38	61	41	19	11.9	2.44	-
C1_102075869	1	44.585	31	74	43	11	6.9	1.95	-
C1_102075872	1	44.585	31	74	43	11	6.9	1.95	-
C1_120703031	1	45.345	41	70	34	14	8.8	0.85	-
C1_120703047	1	45.345	41	70	34	14	8.8	0.85	-
C1_120703054	1	45.345	41	70	34	14	8.8	0.85	-
C1_41616108	1	46.779	41	74	25	19	11.9	4.11	-
C1_101609362	1	46.864	30	77	33	19	11.9	1.53	-
C1_149762107	1	47.374	27	75	32	25	15.7	2.28	-
C1_149762109	1	47.374	27	75	32	25	15.7	2.28	-
C1_35306214	1	47.809	38	84	27	10	6.3	4.05	-
C1_35306217	1	47.809	38	84	27	10	6.3	4.05	-
C1_35306226	1	47.809	38	84	27	10	6.3	4.05	-
C1_10741571	1	48.722	34	86	29	10	6.3	3.89	-
C1_10741582	1	48.722	34	86	29	10	6.3	3.89	-
C1_63948138	1	49.446	41	83	25	10	6.3	5.38	*
C1_41592775	1	50.192	37	83	28	11	6.9	3.28	-
C1_46316445	1	51.218	38	83	28	10	6.3	3.28	-
C1_96231066	1	51.898	40	75	31	13	8.2	1.22	-
C1_72757215	1	53.798	44	80	25	10	6.3	5.66	*
C1_72757217	1	53.798	44	80	25	10	6.3	5.66	*
C1_72757218	1	53.798	44	80	25	10	6.3	5.66	*
C1_72757262	1	53.798	44	80	25	10	6.3	5.66	*
C1_19369014	1	55.325	30	70	47	12	7.5	4.27	-
C1_19369046	1	55.325	30	70	47	12	7.5	4.27	-
C1_1090952	1	57.539	46	73	40	0	0	1.52	-
C1_151451003	1	58.837	44	75	29	11	6.9	3.07	-
C1_95223710	1	60.153	28	83	34	14	8.8	3.54	-
C1_11323758	1	60.547	40	76	38	5	3.1	0.08	-
C1_11323783	1	60.547	40	76	38	5	3.1	0.08	-
C1_11323785	1	60.547	40	76	38	5	3.1	0.08	-
C1_11323805	1	60.547	40	76	38	5	3.1	0.08	-
C1_98619582	1	60.881	46	70	43	0	0	2.38	-
C1_37210518	1	61.101	39	69	29	22	13.8	1.47	-
C1_37210529	1	61.101	39	69	29	22	13.8	1.47	-
C1_111849826	1	63.589	43	62	45	9	5.7	4.56	-
C1_101701618	1	64.001	46	62	45	6	3.8	5.51	*
C1_101701653	1	64.001	46	62	45	6	3.8	5.51	*
C1_101701666	1	64.001	46	62	45	6	3.8	5.51	*
C1_100523947	1	64.733	51	66	40	2	1.3	5.52	*
C1_23673035	1	65.619	49	64	45	1	0.6	5.9	*
C1_53858923	1	66.07	47	68	44	0	0	3.44	-
C1_53858961	1	66.07	47	68	44	0	0	3.44	-
C1_148716509	1	66.607	27	60	44	28	17.6	5.34	*
C1_7143675	1	66.653	48	70	39	2	1.3	2.87	-
C1_88303396	1	66.758	51	66	42	0	0	5.6	*
C1_88303431	1	66.758	51	66	42	0	0	5.6	*
C1_88303443	1	66.758	51	66	42	0	0	5.6	*
C1_46468654	1	67.097	52	67	40	0	0	5.74	*
C1_46468661	1	67.097	52	67	40	0	0	5.74	*
C1_132607034	1	67.379	37	83	38	1	0.6	0.42	-
C1_107842185	1	67.546	49	74	36	0	0	2.89	-
C1_121154569	1	67.919	50	72	37	0	0	3.54	-
C1_27538254	1	68.038	49	69	41	0	0	3.58	-
C1_27538262	1	68.038	49	69	41	0	0	3.58	-
C1_27538272	1	68.038	49	69	41	0	0	3.58	-
C1_71320274	1	68.149	52	68	38	1	0.6	5.54	*
C1_71320275	1	68.149	52	68	38	1	0.6	5.54	*
C1_71320312	1	68.149	52	68	38	1	0.6	5.54	*
C1_34745086	1	68.277	50	71	38	0	0	3.63	-
C1_34745134	1	68.277	50	71	38	0	0	3.63	-
C1_46524391	1	68.391	52	69	38	0	0	5.24	*
C1_34745269	1	68.601	52	70	37	0	0	5.1	*
C1_34745271	1	68.601	52	70	37	0	0	5.1	*
C1_34745272	1	68.601	52	70	37	0	0	5.1	*
C1_34745305	1	68.601	52	70	37	0	0	5.1	*
C1_110208058	1	68.741	50	75	31	0	0	4.86	*
C1_34172467	1	68.941	52	70	37	0	0	5.1	*
C1_76576516	1	69.103	53	71	35	0	0	5.89	*
C1_76576541	1	69.103	53	71	35	0	0	5.89	*
C1_44663146	1	69.22	50	71	38	0	0	3.63	-
C1_44663150	1	69.22	50	71	38	0	0	3.63	-
C1_39526772	1	69.32	50	73	36	0	0	3.53	-
C1_39526809	1	69.32	50	73	36	0	0	3.53	-
C1_39526821	1	69.32	50	73	36	0	0	3.53	-
C1_71330857	1	69.417	48	71	39	1	0.6	2.65	-
C1_71330859	1	69.417	48	71	39	1	0.6	2.65	-
C1_71330896	1	69.417	48	71	39	1	0.6	2.65	-
C1_83507407	1	69.524	49	72	38	0	0	2.94	-
C1_83507408	1	69.524	49	72	38	0	0	2.94	-
C1_83507411	1	69.524	49	72	38	0	0	2.94	-
C1_71372609	1	69.607	49	72	38	0	0	2.94	-
C1_58851442	1	69.689	52	72	35	0	0	5.05	*
C1_67121652	1	69.828	51	72	36	0	0	4.25	-
C1_67121665	1	69.828	51	72	36	0	0	4.25	-
C1_119458538	1	69.83	37	87	26	9	5.7	5.45	*
C1_119458552	1	69.83	37	87	26	9	5.7	5.45	*
C1_71301119	1	69.932	51	73	35	0	0	4.28	-
C1_57876404	1	70.02	49	74	33	0	0	3.69	-
C1_148762714	1	70.032	34	83	29	13	8.2	3.08	-
C1_148762736	1	70.032	34	83	29	13	8.2	3.08	-
C1_44693252	1	70.069	48	74	36	1	0.6	2.46	-
C1_41022147	1	70.145	51	73	35	0	0	4.28	-
C1_41022161	1	70.145	51	73	35	0	0	4.28	-
C1_41022163	1	70.145	51	73	35	0	0	4.28	-
C1_41022165	1	70.145	51	73	35	0	0	4.28	-
C1_41022179	1	70.145	51	73	35	0	0	4.28	-
C1_41022196	1	70.145	51	73	35	0	0	4.28	-
C1_118261688	1	70.182	49	74	36	0	0	2.89	-
C1_57876317	1	70.232	49	74	36	0	0	2.89	-
C1_57876359	1	70.232	49	74	36	0	0	2.89	-
C1_106366438	1	70.282	51	73	35	0	0	4.28	-
C1_41022228	1	70.339	51	74	34	0	0	4.4	-
C1_41022231	1	70.339	51	74	34	0	0	4.4	-
C1_41022272	1	70.339	51	74	34	0	0	4.4	-
C1_41022276	1	70.339	51	74	34	0	0	4.4	-
C1_76576418	1	70.416	48	74	34	0	0	2.92	-
C1_76576446	1	70.416	48	74	34	0	0	2.92	-
C1_76576448	1	70.416	48	74	34	0	0	2.92	-
C1_76576456	1	70.416	48	74	34	0	0	2.92	-
C1_56650485	1	70.452	49	74	35	1	0.6	3.11	-
C1_56650489	1	70.452	49	74	35	1	0.6	3.11	-
C1_16367334	1	70.463	48	75	33	0	0	3.12	-
C1_69988183	1	70.496	49	74	33	0	0	3.69	-
C1_69988197	1	70.496	49	74	33	0	0	3.69	-
C1_36550543	1	70.53	51	74	34	0	0	4.4	-
C1_36550577	1	70.53	51	74	34	0	0	4.4	-
C1_36550579	1	70.53	51	74	34	0	0	4.4	-
C1_56650554	1	70.578	50	74	35	0	0	3.59	-
C1_56650560	1	70.578	50	74	35	0	0	3.59	-
C1_108403384	1	70.629	47	76	33	0	0	2.62	-
C1_110562649	1	70.629	47	76	33	0	0	2.62	-
C1_110562657	1	70.629	47	76	33	0	0	2.62	-
C1_83507322	1	70.651	51	73	35	0	0	4.28	-
C1_83507334	1	70.651	51	73	35	0	0	4.28	-
C1_86002065	1	70.72	52	73	34	0	0	5.14	*
C1_86002067	1	70.72	52	73	34	0	0	5.14	*
C1_86002092	1	70.72	52	73	34	0	0	5.14	*
C1_58831252	1	70.808	51	73	35	0	0	4.28	-
C1_58831259	1	70.808	51	73	35	0	0	4.28	-
C1_92712222	1	70.891	49	74	33	0	0	3.69	-
C1_92712239	1	70.891	49	74	33	0	0	3.69	-
C1_73193	1	70.94	24	76	36	23	14.5	4	-
C1_110208158	1	70.97	47	74	35	0	0	2.26	-
C1_44693180	1	71.022	48	72	38	1	0.6	2.51	-
C1_116029808	1	71.104	50	74	35	0	0	3.59	-
C1_109939225	1	71.199	50	74	35	0	0	3.59	-
C1_95021130	1	71.282	50	73	36	0	0	3.53	-
C1_95021159	1	71.282	50	73	36	0	0	3.53	-
C1_95021160	1	71.282	50	73	36	0	0	3.53	-
C1_33859449	1	71.368	50	73	36	0	0	3.53	-
C1_108703310	1	71.462	50	73	36	0	0	3.53	-
C1_108703329	1	71.462	50	73	36	0	0	3.53	-
C1_46468536	1	71.597	51	71	37	0	0	4.28	-
C1_105795389	1	71.736	48	74	37	0	0	2.28	-
C1_105795395	1	71.736	48	74	37	0	0	2.28	-
C1_101636429	1	71.806	47	74	35	0	0	2.26	-
C1_101636442	1	71.806	47	74	35	0	0	2.26	-
C1_101636446	1	71.806	47	74	35	0	0	2.26	-
C1_55098116	1	71.913	50	71	38	0	0	3.63	-
C1_55098120	1	71.913	50	71	38	0	0	3.63	-
C1_149711162	1	71.993	42	80	34	0	0	0.92	-
C1_149711172	1	71.993	42	80	34	0	0	0.92	-
C1_149711173	1	71.993	42	80	34	0	0	0.92	-
C1_110624510	1	72.06	49	72	37	1	0.6	3.06	-
C1_103529146	1	72.143	47	74	37	1	0.6	1.9	-
C1_67121564	1	72.286	50	72	37	0	0	3.54	-
C1_67121589	1	72.286	50	72	37	0	0	3.54	-
C1_12905242	1	72.432	50	70	39	0	0	3.79	-
C1_29408688	1	72.555	52	69	38	0	0	5.24	*
C1_29408713	1	72.555	52	69	38	0	0	5.24	*
C1_29408718	1	72.555	52	69	38	0	0	5.24	*
C1_132590345	1	72.748	36	80	40	0	0	0.31	-
C1_107052752	1	72.79	46	75	35	0	0	1.78	-
C1_111760569	1	72.891	50	72	37	0	0	3.54	-
C1_105795229	1	73.052	49	72	38	0	0	2.94	-
C1_44663277	1	73.243	52	68	39	0	0	5.45	*
C1_44663297	1	73.243	52	68	39	0	0	5.45	*
C1_53865945	1	73.399	53	71	35	0	0	5.89	*
C1_53865947	1	73.399	53	71	35	0	0	5.89	*
C1_53865967	1	73.399	53	71	35	0	0	5.89	*
C1_53865969	1	73.399	53	71	35	0	0	5.89	*
C1_66662349	1	73.499	52	68	39	0	0	5.45	*
C1_66662375	1	73.499	52	68	39	0	0	5.45	*
C1_66662405	1	73.499	52	68	39	0	0	5.45	*
C1_149711234	1	73.548	41	87	30	1	0.6	3.15	-
C1_149711236	1	73.548	41	87	30	1	0.6	3.15	-
C1_149711264	1	73.548	41	87	30	1	0.6	3.15	-
C1_56020059	1	73.641	50	66	38	5	3.1	5.01	*
C1_56020066	1	73.641	50	66	38	5	3.1	5.01	*
C1_66662187	1	73.937	50	69	40	0	0	4.03	-
C1_66662211	1	73.937	50	69	40	0	0	4.03	-
C1_101580676	1	74.19	50	70	39	0	0	3.79	-
C1_101580690	1	74.19	50	70	39	0	0	3.79	-
C1_86986554	1	74.416	43	59	41	16	10.1	4.43	-
C1_58135782	1	74.864	49	65	45	0	0	5.49	*
C1_58135810	1	74.864	49	65	45	0	0	5.49	*
C1_4533779	1	75.039	52	71	36	0	0	5.04	*
C1_4533804	1	75.039	52	71	36	0	0	5.04	*
C1_4533805	1	75.039	52	71	36	0	0	5.04	*
C1_69949703	1	75.791	40	57	45	17	10.7	5.87	*
C1_69949729	1	75.791	40	57	45	17	10.7	5.87	*
C1_122839107	1	76.767	51	69	39	0	0	4.58	-
C1_122839108	1	76.767	51	69	39	0	0	4.58	-
C1_52056882	1	77.635	36	79	34	10	6.3	0.6	-
C1_7206493	1	77.874	47	67	38	7	4.4	3.2	-
C1_13135643	1	77.913	39	78	39	3	1.9	0	-
C1_79027734	1	79.748	25	79	43	12	7.5	5.23	*
C1_124474681	1	80.968	50	68	41	0	0	4.35	-
C1_124474706	1	80.968	50	68	41	0	0	4.35	-
C1_125441825	1	82.644	49	72	38	0	0	2.94	-
C1_153214306	1	88.037	46	64	40	9	5.7	3.71	-
C1_72747090	1	88.511	44	77	28	10	6.3	3.6	-
C1_153214111	1	89.519	46	67	41	5	3.1	2.92	-
C1_153214150	1	89.519	46	67	41	5	3.1	2.92	-
C1_55565444	1	89.815	32	80	42	5	3.1	1.53	-
C1_32144866	1	90.57	47	71	30	11	6.9	4.15	-
C1_151341172	1	91.142	42	65	44	8	5	2.97	-
C1_53865368	1	91.353	40	60	31	28	17.6	2.16	-
C1_151341167	1	91.678	42	64	45	8	5	3.62	-
C1_151341169	1	91.678	42	64	45	8	5	3.62	-
C1_151358740	1	92.385	42	74	40	0	0	0.46	-
C1_151358751	1	92.385	42	74	40	0	0	0.46	-
C1_151358755	1	92.385	42	74	40	0	0	0.46	-
C1_151358765	1	92.385	42	74	40	0	0	0.46	-
C1_44444008	1	93.057	45	78	28	8	5	3.99	-
C1_153247348	1	93.265	40	79	39	1	0.6	0.01	-
C1_153247403	1	93.265	40	79	39	1	0.6	0.01	-
C1_35305935	1	93.633	38	86	28	7	4.4	3.95	-
C1_151341079	1	93.966	43	64	40	12	7.5	2.58	-
C1_151341080	1	93.966	43	64	40	12	7.5	2.58	-
C1_151341096	1	93.966	43	64	40	12	7.5	2.58	-
C1_60936228	1	94.218	46	65	31	17	10.7	4.18	-
C1_24835634	1	94.739	35	73	39	12	7.5	0.22	-
C1_24835655	1	94.739	35	73	39	12	7.5	0.22	-
C1_24835686	1	94.739	35	73	39	12	7.5	0.22	-
C1_67649659	1	95.148	36	72	35	16	10.1	0.02	-
C1_67330616	1	95.403	41	56	43	19	11.9	5.66	*
C1_147868027	1	95.638	40	71	47	1	0.6	2.24	-
C1_107586079	1	96.007	37	73	32	17	10.7	0.46	-
C1_107586080	1	96.007	37	73	32	17	10.7	0.46	-
C1_107586111	1	96.007	37	73	32	17	10.7	0.46	-
C1_107586114	1	96.007	37	73	32	17	10.7	0.46	-
C1_107586117	1	96.007	37	73	32	17	10.7	0.46	-
C1_11013038	1	96.572	33	84	34	8	5	1.93	-
C1_148816332	1	96.729	44	74	38	0	0	0.87	-
C1_60936227	1	96.785	42	67	33	17	10.7	1.59	-
C1_60936257	1	96.853	42	63	37	17	10.7	2.15	-
C1_148816193	1	97.227	42	79	35	0	0	0.65	-
C1_33360538	1	97.791	43	72	35	9	5.7	1.09	-
C1_33360540	1	97.791	43	72	35	9	5.7	1.09	-
C1_147837175	1	97.924	44	73	42	0	0	1.11	-
C1_33406635	1	98.257	42	69	36	12	7.5	1.04	-
C1_33406636	1	98.257	42	69	36	12	7.5	1.04	-
C1_33406639	1	98.257	42	69	36	12	7.5	1.04	-
C1_147786591	1	98.467	43	76	37	0	0	0.56	-
C1_147786598	1	98.467	43	76	37	0	0	0.56	-
C1_33360405	1	98.553	39	79	30	11	6.9	1.77	-
C1_33360440	1	98.553	39	79	30	11	6.9	1.77	-
C1_144072313	1	101.074	43	75	38	0	0	0.55	-
C1_144072333	1	101.074	43	75	38	0	0	0.55	-
C1_55756386	1	101.083	38	72	35	14	8.8	0.13	-
C1_55756401	1	101.083	38	72	35	14	8.8	0.13	-
C1_143827692	1	101.501	44	76	36	0	0	0.92	-
C1_143827718	1	101.501	44	76	36	0	0	0.92	-
C1_143834029	1	101.875	43	77	36	0	0	0.65	-
C1_143834068	1	101.875	43	77	36	0	0	0.65	-
C1_143752098	1	102.416	45	75	36	0	0	1.27	-
C1_143752109	1	102.416	45	75	36	0	0	1.27	-
C1_143752113	1	102.416	45	75	36	0	0	1.27	-
C1_85554580	1	102.697	36	53	41	29	18.2	4.82	*
C1_85554591	1	102.697	36	53	41	29	18.2	4.82	*
C1_144096969	1	103.138	41	76	39	0	0	0.15	-
C1_144096998	1	103.138	41	76	39	0	0	0.15	-
C1_144097022	1	103.138	41	76	39	0	0	0.15	-
C1_125596245	1	104.353	31	90	33	5	3.1	4.44	-
C1_139363957	1	105.981	45	68	44	2	1.3	2.82	-
C1_22172951	1	106.105	37	65	41	16	10.1	1.41	-
C1_138723379	1	107.972	41	78	37	0	0	0.21	-
C1_138723389	1	107.972	41	78	37	0	0	0.21	-
C1_138723406	1	107.972	41	78	37	0	0	0.21	-
C1_136678558	1	108.839	43	78	35	0	0	0.82	-
C1_140272586	1	109.385	45	74	40	0	0	1.08	-
C1_138723199	1	110.229	44	76	36	0	0	0.92	-
C1_138723208	1	110.229	44	76	36	0	0	0.92	-
C1_138723209	1	110.229	44	76	36	0	0	0.92	-
C1_138723224	1	110.229	44	76	36	0	0	0.92	-
C1_140346209	1	110.519	44	76	37	2	1.3	0.78	-
C1_138579426	1	111.303	47	69	42	1	0.6	2.85	-
C1_138579429	1	111.303	47	69	42	1	0.6	2.85	-
C1_138579432	1	111.303	47	69	42	1	0.6	2.85	-
C1_138579447	1	111.303	47	69	42	1	0.6	2.85	-
C1_138579579	1	112.449	45	71	43	0	0	1.87	-
C1_139303694	1	113.404	45	67	42	5	3.1	2.71	-
C1_139303712	1	113.404	45	67	42	5	3.1	2.71	-
C1_76766084	1	116.7	28	81	42	8	5	3.4	-
C1_58453103	1	116.851	33	80	38	8	5	0.87	-
C1_153747685	1	129.07	37	64	42	16	10.1	1.92	-
C1_153747711	1	129.07	37	64	42	16	10.1	1.92	-
C2_76714485	2	0	35	59	35	30	18.9	0.94	-
C2_76714486	2	0	35	59	35	30	18.9	0.94	-
C2_76714529	2	0	35	59	35	30	18.9	0.94	-
C2_30777138	2	8.367	38	67	35	19	11.9	0.39	-
C2_163717782	2	12.008	40	73	28	18	11.3	2.22	-
C2_170266348	2	14.344	37	86	30	6	3.8	3	-
C2_170266349	2	14.344	37	86	30	6	3.8	3	-
C2_134937287	2	22.258	42	76	39	2	1.3	0.27	-
C2_65038364	2	30.912	43	74	39	0	0	0.62	-
C2_65038391	2	30.912	43	74	39	0	0	0.62	-
C2_65038566	2	33.27	44	74	38	0	0	0.87	-
C2_65038571	2	33.27	44	74	38	0	0	0.87	-
C2_71770945	2	34.067	34	69	41	15	9.4	0.93	-
C2_62137064	2	34.541	46	59	35	19	11.9	5.19	*
C2_62137103	2	34.541	46	59	35	19	11.9	5.19	*
C2_9995720	2	35.193	34	77	43	5	3.1	1.05	-
C2_9995728	2	35.193	34	77	43	5	3.1	1.05	-
C2_143734894	2	35.622	43	62	30	24	15.1	3.4	-
C2_126434976	2	36.079	42	65	31	21	13.2	2.22	-
C2_62824883	2	37.426	39	66	35	19	11.9	0.69	-
C2_62824908	2	37.426	39	66	35	19	11.9	0.69	-
C2_62824921	2	37.426	39	66	35	19	11.9	0.69	-
C2_163376566	2	37.942	44	66	34	15	9.4	2.39	-
C2_137773521	2	38.512	29	79	46	5	3.1	3.86	-
C2_28197098	2	38.875	44	69	28	18	11.3	3.7	-
C2_28197100	2	38.875	44	69	28	18	11.3	3.7	-
C2_57143546	2	39.146	41	68	31	19	11.9	1.54	-
C2_57143569	2	39.146	41	68	31	19	11.9	1.54	-
C2_52461832	2	40.057	36	81	32	10	6.3	1.35	-
C2_43129580	2	40.58	46	76	29	8	5	3.83	-
C2_43129599	2	40.58	46	76	29	8	5	3.83	-
C2_62137550	2	40.767	45	76	29	9	5.7	3.44	-
C2_62137568	2	40.809	45	75	30	9	5.7	3	-
C2_143806725	2	41.227	28	86	33	12	7.5	4.59	-
C2_93139495	2	41.346	33	89	31	6	3.8	4.14	-
C2_104875373	2	43.076	44	72	27	16	10.1	4.05	-
C2_104875386	2	43.076	44	72	27	16	10.1	4.05	-
C2_104875388	2	43.076	44	72	27	16	10.1	4.05	-
C2_104875394	2	43.076	44	72	27	16	10.1	4.05	-
C2_100623101	2	44.03	42	66	37	14	8.8	1.51	-
C2_100623136	2	44.03	42	66	37	14	8.8	1.51	-
C2_25879638	2	44.86	43	66	27	23	14.5	3.88	-
C2_25879635	2	45.704	41	67	28	23	14.5	2.51	-
C2_25879646	2	45.704	41	67	28	23	14.5	2.51	-
C2_52846678	2	46.973	37	83	32	7	4.4	1.62	-
C2_52846680	2	46.973	37	83	32	7	4.4	1.62	-
C2_52846689	2	46.973	37	83	32	7	4.4	1.62	-
C2_109460082	2	48.223	44	66	25	24	15.1	5.41	*
C2_109460106	2	48.223	44	66	25	24	15.1	5.41	*
C2_112685774	2	48.665	31	82	29	17	10.7	3.46	-
C2_46503090	2	51.137	28	87	42	2	1.3	4.34	-
C2_46503098	2	51.137	28	87	42	2	1.3	4.34	-
C2_173831610	2	53.579	32	73	40	14	8.8	0.89	-
C2_179388618	2	54.323	42	63	41	13	8.2	2.75	-
C2_10758257	2	57.487	41	65	46	7	4.4	3.51	-
C2_9795351	2	57.789	48	66	45	0	0	4.7	*
C2_139537626	2	58.389	47	65	47	0	0	5.29	*
C2_139537636	2	58.389	47	65	47	0	0	5.29	*
C2_139537643	2	58.389	47	65	47	0	0	5.29	*
C2_65247358	2	58.75	44	62	45	8	5	4.84	*
C2_65247389	2	58.75	44	62	45	8	5	4.84	*
C2_105000034	2	58.918	51	65	42	1	0.6	5.99	*
C2_105000056	2	58.918	51	65	42	1	0.6	5.99	*
C2_105000064	2	58.918	51	65	42	1	0.6	5.99	*
C2_148039832	2	59.083	46	66	47	0	0	4.6	-
C2_148039850	2	59.083	46	66	47	0	0	4.6	-
C2_14405749	2	59.206	51	69	39	0	0	4.58	-
C2_136086203	2	59.431	47	65	47	0	0	5.29	*
C2_136086205	2	59.431	47	65	47	0	0	5.29	*
C2_136086224	2	59.431	47	65	47	0	0	5.29	*
C2_136086225	2	59.431	47	65	47	0	0	5.29	*
C2_94587846	2	59.557	46	70	42	1	0.6	2.25	-
C2_94587847	2	59.557	46	70	42	1	0.6	2.25	-
C2_132029636	2	59.881	50	66	43	0	0	5.2	*
C2_52827638	2	60.142	51	67	40	1	0.6	5.18	*
C2_3042086	2	60.239	50	71	38	0	0	3.63	-
C2_3042098	2	60.239	50	71	38	0	0	3.63	-
C2_19279301	2	60.417	46	70	42	1	0.6	2.25	-
C2_19279345	2	60.417	46	70	42	1	0.6	2.25	-
C2_179412303	2	60.434	39	74	43	3	1.9	0.62	-
C2_142498115	2	60.501	48	67	44	0	0	4.13	-
C2_145395203	2	60.586	47	67	45	0	0	3.98	-
C2_145395219	2	60.586	47	67	45	0	0	3.98	-
C2_142559871	2	60.662	47	67	45	0	0	3.98	-
C2_114450383	2	60.74	49	67	42	1	0.6	4.27	-
C2_114450416	2	60.74	49	67	42	1	0.6	4.27	-
C2_112651991	2	60.926	51	67	41	0	0	5.19	*
C2_46250087	2	60.927	49	72	38	0	0	2.94	-
C2_46250120	2	60.927	49	72	38	0	0	2.94	-
C2_145395037	2	61.027	46	70	43	0	0	2.38	-
C2_145395043	2	61.027	46	70	43	0	0	2.38	-
C2_115879420	2	61.263	48	69	42	0	0	3.23	-
C2_128907750	2	61.326	48	69	42	0	0	3.23	-
C2_128907754	2	61.326	48	69	42	0	0	3.23	-
C2_128907760	2	61.326	48	69	42	0	0	3.23	-
C2_133118537	2	61.417	48	69	42	0	0	3.23	-
C2_128907730	2	61.482	46	72	41	0	0	1.73	-
C2_128907732	2	61.482	46	72	41	0	0	1.73	-
C2_128907745	2	61.482	46	72	41	0	0	1.73	-
C2_46012645	2	61.539	48	72	39	0	0	2.43	-
C2_63534659	2	61.642	50	69	40	0	0	4.03	-
C2_63534667	2	61.642	50	69	40	0	0	4.03	-
C2_63534710	2	61.642	50	69	40	0	0	4.03	-
C2_48240092	2	61.767	48	73	38	0	0	2.32	-
C2_113859207	2	61.909	48	71	40	0	0	2.62	-
C2_112670318	2	62.02	47	71	41	0	0	2.27	-
C2_122533237	2	62.069	46	73	39	1	0.6	1.53	-
C2_81562292	2	62.227	47	73	38	1	0.6	1.94	-
C2_81562302	2	62.227	47	73	38	1	0.6	1.94	-
C2_45968815	2	62.259	47	72	40	0	0	2.03	-
C2_45968844	2	62.259	47	72	40	0	0	2.03	-
C2_8010177	2	62.313	39	66	43	11	6.9	1.95	-
C2_8010179	2	62.313	39	66	43	11	6.9	1.95	-
C2_107605769	2	62.336	48	71	39	1	0.6	2.65	-
C2_95921026	2	62.401	48	71	40	0	0	2.62	-
C2_65201390	2	62.473	48	71	40	0	0	2.62	-
C2_122533158	2	62.542	49	71	39	0	0	3.08	-
C2_18509707	2	62.636	49	71	39	0	0	3.08	-
C2_18509715	2	62.636	49	71	39	0	0	3.08	-
C2_18509716	2	62.636	49	71	39	0	0	3.08	-
C2_18509730	2	62.636	49	71	39	0	0	3.08	-
C2_18509736	2	62.636	49	71	39	0	0	3.08	-
C2_40941590	2	62.707	47	72	40	0	0	2.03	-
C2_40941615	2	62.707	47	72	40	0	0	2.03	-
C2_94587672	2	62.767	47	72	40	0	0	2.03	-
C2_94587704	2	62.767	47	72	40	0	0	2.03	-
C2_119174464	2	62.848	48	72	39	0	0	2.43	-
C2_88818915	2	62.888	46	72	41	0	0	1.73	-
C2_123441013	2	62.966	46	72	40	1	0.6	1.7	-
C2_45968752	2	63.019	47	71	41	0	0	2.27	-
C2_123083229	2	63.056	47	73	39	0	0	1.87	-
C2_22853199	2	63.093	47	73	38	1	0.6	1.94	-
C2_38076033	2	63.134	47	73	39	0	0	1.87	-
C2_38076035	2	63.134	47	73	39	0	0	1.87	-
C2_38076056	2	63.134	47	73	39	0	0	1.87	-
C2_38076057	2	63.134	47	73	39	0	0	1.87	-
C2_112466819	2	63.147	46	73	40	0	0	1.52	-
C2_113076466	2	63.186	44	77	35	0	0	1.06	-
C2_113076483	2	63.186	44	77	35	0	0	1.06	-
C2_113076567	2	63.233	46	74	39	0	0	1.38	-
C2_113076613	2	63.233	46	74	39	0	0	1.38	-
C2_113076616	2	63.233	46	74	39	0	0	1.38	-
C2_97433542	2	63.277	47	74	38	0	0	1.78	-
C2_65134486	2	63.323	44	76	36	0	0	0.92	-
C2_27623115	2	63.401	48	72	39	0	0	2.43	-
C2_27623116	2	63.401	48	72	39	0	0	2.43	-
C2_22003717	2	63.439	47	74	38	0	0	1.78	-
C2_71415791	2	63.493	48	74	37	0	0	2.28	-
C2_37733033	2	63.537	46	75	35	0	0	1.78	-
C2_37733041	2	63.537	46	75	35	0	0	1.78	-
C2_53236984	2	63.545	45	76	35	0	0	1.38	-
C2_53236996	2	63.545	45	76	35	0	0	1.38	-
C2_53237053	2	63.545	45	76	35	0	0	1.38	-
C2_16249265	2	63.56	45	75	36	0	0	1.27	-
C2_16249284	2	63.56	45	75	36	0	0	1.27	-
C2_46503184	2	63.58	46	75	35	0	0	1.78	-
C2_46503188	2	63.58	46	75	35	0	0	1.78	-
C2_70797786	2	63.623	46	77	33	0	0	2.19	-
C2_70797795	2	63.623	46	77	33	0	0	2.19	-
C2_45990309	2	63.643	47	72	40	0	0	2.03	-
C2_40941498	2	63.709	47	73	39	0	0	1.87	-
C2_40941504	2	63.709	47	73	39	0	0	1.87	-
C2_24671245	2	63.729	48	73	38	0	0	2.32	-
C2_98061193	2	63.765	46	74	39	0	0	1.38	-
C2_56960497	2	63.799	49	73	37	0	0	2.87	-
C2_56960528	2	63.799	49	73	37	0	0	2.87	-
C2_56960535	2	63.799	49	73	37	0	0	2.87	-
C2_106396795	2	63.839	48	73	38	0	0	2.32	-
C2_44060190	2	63.885	45	74	40	0	0	1.08	-
C2_43242610	2	63.964	49	72	38	0	0	2.94	-
C2_73056629	2	64.019	49	72	37	1	0.6	3.06	-
C2_73056636	2	64.019	49	72	37	1	0.6	3.06	-
C2_73056671	2	64.019	49	72	37	1	0.6	3.06	-
C2_94726539	2	64.061	48	72	39	0	0	2.43	-
C2_94726555	2	64.061	48	72	39	0	0	2.43	-
C2_37733193	2	64.133	47	74	38	0	0	1.78	-
C2_37733194	2	64.133	47	74	38	0	0	1.78	-
C2_37733200	2	64.133	47	74	38	0	0	1.78	-
C2_37733228	2	64.133	47	74	38	0	0	1.78	-
C2_68217354	2	64.218	47	72	40	0	0	2.03	-
C2_24671192	2	64.274	47	75	34	0	0	2.4	-
C2_24671195	2	64.274	47	75	34	0	0	2.4	-
C2_37733101	2	64.351	49	73	37	0	0	2.87	-
C2_37733102	2	64.351	49	73	37	0	0	2.87	-
C2_37733112	2	64.351	49	73	37	0	0	2.87	-
C2_37733144	2	64.351	49	73	37	0	0	2.87	-
C2_34197765	2	64.468	48	71	40	0	0	2.62	-
C2_26847684	2	64.541	49	71	39	0	0	3.08	-
C2_65201525	2	64.621	49	74	36	0	0	2.89	-
C2_65201555	2	64.621	49	74	36	0	0	2.89	-
C2_63534585	2	64.708	48	71	40	0	0	2.62	-
C2_63534606	2	64.708	48	71	40	0	0	2.62	-
C2_56677904	2	64.776	49	70	40	0	0	3.29	-
C2_179405239	2	64.81	38	83	36	2	1.3	0.57	-
C2_179405257	2	64.81	38	83	36	2	1.3	0.57	-
C2_39133966	2	64.885	49	70	39	1	0.6	3.32	-
C2_106067123	2	64.943	48	72	39	0	0	2.43	-
C2_26847776	2	64.97	48	72	39	0	0	2.43	-
C2_26847805	2	64.97	48	72	39	0	0	2.43	-
C2_95921109	2	65.024	48	70	41	0	0	2.89	-
C2_37732961	2	65.116	49	70	40	0	0	3.29	-
C2_37732962	2	65.116	49	70	40	0	0	3.29	-
C2_37732976	2	65.116	49	70	40	0	0	3.29	-
C2_14405799	2	65.188	50	70	39	0	0	3.79	-
C2_14405807	2	65.188	50	70	39	0	0	3.79	-
C2_14405830	2	65.188	50	70	39	0	0	3.79	-
C2_14405836	2	65.188	50	70	39	0	0	3.79	-
C2_116531837	2	65.293	48	70	41	0	0	2.89	-
C2_32841782	2	65.373	45	72	42	0	0	1.53	-
C2_8432960	2	65.491	48	70	41	0	0	2.89	-
C2_7086374	2	65.558	47	69	43	0	0	2.97	-
C2_7086406	2	65.558	47	69	43	0	0	2.97	-
C2_62956537	2	65.732	47	68	43	1	0.6	3.27	-
C2_62956550	2	65.732	47	68	43	1	0.6	3.27	-
C2_73486081	2	65.811	49	73	37	0	0	2.87	-
C2_39084148	2	65.911	52	68	38	1	0.6	5.54	*
C2_39084149	2	65.911	52	68	38	1	0.6	5.54	*
C2_39084177	2	65.911	52	68	38	1	0.6	5.54	*
C2_39084183	2	65.911	52	68	38	1	0.6	5.54	*
C2_13316199	2	66.063	52	69	37	1	0.6	5.38	*
C2_112929777	2	66.169	49	67	42	1	0.6	4.27	-
C2_79425510	2	66.352	48	68	43	0	0	3.64	-
C2_79425539	2	66.352	48	68	43	0	0	3.64	-
C2_110300359	2	66.437	51	68	40	0	0	4.85	*
C2_110300361	2	66.437	51	68	40	0	0	4.85	*
C2_10838555	2	66.507	36	75	35	13	8.2	0.12	-
C2_48240199	2	66.538	48	70	41	0	0	2.89	-
C2_76007053	2	66.638	47	69	43	0	0	2.97	-
C2_76007066	2	66.638	47	69	43	0	0	2.97	-
C2_76007098	2	66.638	47	69	43	0	0	2.97	-
C2_39133920	2	66.723	50	67	40	2	1.3	4.64	*
C2_97332437	2	66.87	49	68	41	1	0.6	3.87	-
C2_57198733	2	66.991	46	66	46	1	0.6	4.28	-
C2_74849328	2	67.263	48	69	41	1	0.6	3.15	-
C2_74849339	2	67.263	48	69	41	1	0.6	3.15	-
C2_13316102	2	67.46	51	66	42	0	0	5.6	*
C2_13316103	2	67.46	51	66	42	0	0	5.6	*
C2_9795216	2	67.71	45	68	46	0	0	3.34	-
C2_9795237	2	67.71	45	68	46	0	0	3.34	-
C2_106066991	2	67.895	49	67	43	0	0	4.38	-
C2_106067023	2	67.895	49	67	43	0	0	4.38	-
C2_10920931	2	68.024	33	87	36	0	0	2.19	-
C2_44793308	2	68.052	51	67	41	0	0	5.19	*
C2_44793309	2	68.052	51	67	41	0	0	5.19	*
C2_44793335	2	68.052	51	67	41	0	0	5.19	*
C2_105135109	2	68.293	48	64	42	5	3.1	4.86	*
C2_105135158	2	68.293	48	64	42	5	3.1	4.86	*
C2_67774631	2	68.503	48	65	45	1	0.6	5.08	*
C2_67774633	2	68.503	48	65	45	1	0.6	5.08	*
C2_53560972	2	68.81	45	65	49	0	0	5.49	*
C2_53560991	2	68.81	45	65	49	0	0	5.49	*
C2_53560994	2	68.81	45	65	49	0	0	5.49	*
C2_58636358	2	69.666	30	89	38	2	1.3	3.62	-
C2_130814118	2	70.817	36	91	31	1	0.6	3.96	-
C2_176744127	2	71.29	41	82	26	10	6.3	4.53	-
C2_176744132	2	71.29	41	82	26	10	6.3	4.53	-
C2_157528095	2	71.943	36	92	28	0	0	5.85	*
C2_157528115	2	71.943	36	92	28	0	0	5.85	*
C2_157528119	2	71.943	36	92	28	0	0	5.85	*
C2_69287553	2	73.659	38	78	31	12	7.5	1.22	-
C2_69287589	2	73.659	38	78	31	12	7.5	1.22	-
C2_174979149	2	75.028	39	69	29	22	13.8	1.47	-
C2_174979158	2	75.028	39	69	29	22	13.8	1.47	-
C2_174979197	2	75.028	39	69	29	22	13.8	1.47	-
C2_3891375	2	75.037	43	86	27	0	0	4.92	*
C2_3891405	2	75.037	43	86	27	0	0	4.92	*
C2_3891407	2	75.037	43	86	27	0	0	4.92	*
C2_3936197	2	75.717	37	89	30	0	0	3.73	-
C2_45948738	2	76.67	35	87	29	8	5	3.98	-
C2_45948739	2	76.67	35	87	29	8	5	3.98	-
C2_45948751	2	76.67	35	87	29	8	5	3.98	-
C2_45948756	2	76.67	35	87	29	8	5	3.98	-
C2_45948764	2	76.67	35	87	29	8	5	3.98	-
C2_45948767	2	76.67	35	87	29	8	5	3.98	-
C2_3936302	2	77.244	39	83	34	0	0	0.96	-
C2_3936309	2	77.244	39	83	34	0	0	0.96	-
C2_3936323	2	77.244	39	83	34	0	0	0.96	-
C2_38074049	2	77.723	43	75	25	16	10.1	4.87	*
C2_100171519	2	78.205	40	56	43	20	12.6	5.37	*
C2_3891275	2	79.187	39	83	34	0	0	0.96	-
C2_72279669	2	80.602	33	82	35	9	5.7	1.36	-
C2_99029911	2	81.585	42	61	45	11	6.9	4.69	*
C2_99029932	2	81.585	42	61	45	11	6.9	4.69	*
C2_131609907	2	82.101	28	68	47	16	10.1	5.39	*
C2_131609937	2	82.101	28	68	47	16	10.1	5.39	*
C2_88931027	2	82.474	40	87	26	6	3.8	5.44	*
C2_145392747	2	82.994	35	76	33	15	9.4	0.5	-
C2_145392763	2	82.994	35	76	33	15	9.4	0.5	-
C2_163717815	2	83.354	28	74	39	18	11.3	2.06	-
C2_43514515	2	84.021	35	68	38	18	11.3	0.3	-
C2_43514523	2	84.021	35	68	38	18	11.3	0.3	-
C2_43514530	2	84.021	35	68	38	18	11.3	0.3	-
C2_141062679	2	84.214	39	76	33	11	6.9	0.59	-
C2_141062680	2	84.214	39	76	33	11	6.9	0.59	-
C2_30451293	2	84.455	47	64	35	13	8.2	4.19	-
C2_145392946	2	84.971	35	79	32	13	8.2	1.11	-
C2_25879609	2	85.366	42	68	23	26	16.4	5.5	*
C2_39126606	2	85.868	31	77	28	23	14.5	2.51	-
C2_30206794	2	86.336	43	72	42	2	1.3	1.09	-
C2_148336324	2	86.594	37	75	32	15	9.4	0.6	-
C2_148336334	2	86.594	37	75	32	15	9.4	0.6	-
C2_107610652	2	87.455	41	78	28	12	7.5	2.85	-
C2_37834712	2	87.648	28	84	34	13	8.2	3.81	-
C2_37834713	2	87.648	28	84	34	13	8.2	3.81	-
C2_37834723	2	87.648	28	84	34	13	8.2	3.81	-
C2_37834731	2	87.648	28	84	34	13	8.2	3.81	-
C2_37834759	2	87.648	28	84	34	13	8.2	3.81	-
C2_26503296	2	88.104	46	64	34	15	9.4	3.78	-
C2_132456390	2	88.286	36	60	37	26	16.4	1.29	-
C2_54054256	2	89.017	41	74	31	13	8.2	1.4	-
C2_54054268	2	89.017	41	74	31	13	8.2	1.4	-
C2_124925305	2	89.31	46	65	32	16	10.1	3.92	-
C2_124925312	2	89.31	46	65	32	16	10.1	3.92	-
C2_170729279	2	90.911	41	71	43	4	2.5	1.14	-
C2_112783104	2	90.937	42	62	36	19	11.9	2.34	-
C2_112783107	2	90.937	42	62	36	19	11.9	2.34	-
C2_112783124	2	90.937	42	62	36	19	11.9	2.34	-
C2_124925513	2	91.478	39	73	36	11	6.9	0.15	-
C2_124925517	2	91.478	39	73	36	11	6.9	0.15	-
C2_159229416	2	92.38	32	64	45	18	11.3	3.6	-
C2_159229440	2	92.38	32	64	45	18	11.3	3.6	-
C2_14888144	2	92.392	33	79	39	8	5	0.8	-
C2_118362465	2	95.166	46	69	43	1	0.6	2.65	-
C2_118362468	2	95.166	46	69	43	1	0.6	2.65	-
C2_83279407	2	95.281	44	69	25	21	13.2	5.23	*
C2_1893213	2	96.645	35	68	40	16	10.1	0.69	-
C2_1893260	2	96.645	35	68	40	16	10.1	0.69	-
C2_146950158	2	98.837	42	82	32	0	0	1.69	-
C2_176896082	2	102.908	50	71	38	0	0	3.63	-
C2_176896100	2	102.908	50	71	38	0	0	3.63	-
C2_126968416	2	103.897	47	75	34	0	0	2.4	-
C2_58336579	2	103.931	49	65	40	5	3.1	4.79	*
C2_58336589	2	104.286	49	64	41	5	3.1	5.22	*
C2_160191122	2	109.522	50	67	42	0	0	4.74	*
C2_63557209	2	109.918	40	51	38	30	18.9	5.71	*
C2_158134667	2	113.607	32	82	33	12	7.5	1.98	-
C2_55777642	2	117.096	42	71	32	14	8.8	1.44	-
C2_100575368	2	121.964	29	73	32	25	15.7	1.21	-
C2_100575408	2	121.964	29	73	32	25	15.7	1.21	-
C2_100575413	2	121.964	29	73	32	25	15.7	1.21	-
C2_100575422	2	121.964	29	73	32	25	15.7	1.21	-
C2_100575423	2	121.964	29	73	32	25	15.7	1.21	-
C3_146039055	3	0	22	87	43	7	4.4	8.99	**
C3_148077560	3	2.718	35	81	30	13	8.2	2.1	-
C3_148077568	3	2.718	35	81	30	13	8.2	2.1	-
C3_126011695	3	10.221	24	89	38	8	5	7.42	**
C3_126011700	3	10.221	24	89	38	8	5	7.42	**
C3_126011703	3	10.221	24	89	38	8	5	7.42	**
C3_126011730	3	10.221	24	89	38	8	5	7.42	**
C3_123716949	3	11.297	38	86	28	7	4.4	3.95	-
C3_123716964	3	11.297	38	86	28	7	4.4	3.95	-
C3_108139110	3	11.766	38	62	30	29	18.2	1.26	-
C3_59109119	3	14.404	32	76	34	17	10.7	0.76	-
C3_59109166	3	14.404	32	76	34	17	10.7	0.76	-
C3_108139109	3	14.45	41	63	26	29	18.2	3.58	-
C3_108139126	3	14.45	41	63	26	29	18.2	3.58	-
C3_108139130	3	14.45	41	63	26	29	18.2	3.58	-
C3_155286494	3	22.152	30	91	32	6	3.8	5.55	*
C3_155286500	3	22.152	30	91	32	6	3.8	5.55	*
C3_15468577	3	25.406	45	65	24	25	15.7	6.7	**
C3_148395759	3	26.02	47	62	37	13	8.2	4.68	*
C3_87285277	3	29.367	46	71	27	15	9.4	5.04	*
C3_87285286	3	29.367	46	71	27	15	9.4	5.04	*
C3_87285311	3	29.367	46	71	27	15	9.4	5.04	*
C3_160259171	3	29.665	53	67	38	1	0.6	6.49	**
C3_160259183	3	29.665	53	67	38	1	0.6	6.49	**
C3_64357725	3	33.632	41	82	33	0	0	1.23	-
C3_130366199	3	34.134	32	92	32	0	0	5.03	*
C3_130366222	3	34.134	32	92	32	0	0	5.03	*
C3_50515729	3	34.824	44	82	30	0	0	2.92	-
C3_148900345	3	35.675	43	82	32	2	1.3	1.85	-
C3_66213570	3	36.343	28	88	27	16	10.1	7.63	**
C3_87285279	3	36.577	35	69	40	15	9.4	0.6	-
C3_87285293	3	36.577	35	69	40	15	9.4	0.6	-
C3_64037819	3	37.734	47	72	30	10	6.3	4.05	-
C3_69845299	3	38.13	49	71	39	0	0	3.08	-
C3_69845311	3	38.13	49	71	39	0	0	3.08	-
C3_167000502	3	39.537	32	62	51	14	8.8	8.02	**
C3_167000505	3	39.537	32	62	51	14	8.8	8.02	**
C3_146039078	3	44.572	44	86	22	7	4.4	9	**
C3_146039079	3	44.572	44	86	22	7	4.4	9	**
C3_80686009	3	45.56	39	66	26	28	17.6	2.59	-
C3_5473601	3	46.251	33	59	48	19	11.9	6.67	**
C3_5473616	3	46.251	33	59	48	19	11.9	6.67	**
C3_5473626	3	46.251	33	59	48	19	11.9	6.67	**
C3_5473627	3	46.251	33	59	48	19	11.9	6.67	**
C3_101373312	3	52.373	38	78	33	10	6.3	0.66	-
C3_127526914	3	53.114	33	62	39	25	15.7	1.28	-
C3_127526958	3	53.114	33	62	39	25	15.7	1.28	-
C3_127526961	3	53.114	33	62	39	25	15.7	1.28	-
C3_127526967	3	53.114	33	62	39	25	15.7	1.28	-
C3_5473565	3	55.556	49	57	42	11	6.9	8.47	**
C3_64794904	3	56.42	41	83	26	9	5.7	4.71	*
C3_64794914	3	56.42	41	83	26	9	5.7	4.71	*
C3_144441960	3	58.716	40	50	38	31	19.5	6.19	**
C3_144441963	3	58.716	40	50	38	31	19.5	6.19	**
C3_154068957	3	66.285	41	57	40	21	13.2	4.19	-
C3_154068965	3	66.285	41	57	40	21	13.2	4.19	-
C3_9181467	3	66.406	51	67	40	1	0.6	5.18	*
C3_47291498	3	68.499	46	55	27	31	19.5	8.17	**
C3_47291530	3	68.499	46	55	27	31	19.5	8.17	**
C3_144870629	3	71.086	40	78	38	3	1.9	0.05	-
C3_144870635	3	71.086	40	78	38	3	1.9	0.05	-
C3_121879390	3	72.348	26	80	29	24	15.1	4.76	*
C3_158622895	3	84.566	42	76	25	16	10.1	4.61	*
C3_34434097	3	85.226	44	76	30	9	5.7	2.64	-
C3_165016518	3	89.5	42	68	24	25	15.7	4.87	*
C3_165016547	3	89.5	42	68	24	25	15.7	4.87	*
C3_165016553	3	89.5	42	68	24	25	15.7	4.87	*
C3_105953217	3	93.408	41	73	39	6	3.8	0.37	-
C3_164928787	3	97.468	43	63	29	24	15.1	3.5	-
C3_164928791	3	97.468	43	63	29	24	15.1	3.5	-
C3_164928793	3	97.468	43	63	29	24	15.1	3.5	-
C3_164022607	3	98.192	35	91	27	6	3.8	6.33	**
C3_164022613	3	98.192	35	91	27	6	3.8	6.33	**
C3_164022622	3	98.192	35	91	27	6	3.8	6.33	**
C3_164022628	3	98.192	35	91	27	6	3.8	6.33	**
C3_164022637	3	98.192	35	91	27	6	3.8	6.33	**
C3_164928828	3	98.712	42	61	32	24	15.1	2.73	-
C3_73686176	3	101.377	36	56	40	27	17	3.27	-
C3_107570027	3	112.342	50	56	39	14	8.8	9.18	**
C3_50430764	3	116.575	46	53	29	31	19.5	8.3	**
C3_50430803	3	116.575	46	53	29	31	19.5	8.3	**
C3_166201459	3	117.938	37	71	46	5	3.1	1.99	-
C3_166201489	3	117.938	37	71	46	5	3.1	1.99	-
C3_166201646	3	118.981	41	69	44	5	3.1	1.78	-
C3_166201656	3	118.981	41	69	44	5	3.1	1.78	-
C3_117059419	3	119.325	52	74	33	0	0	5.3	*
C3_117059447	3	119.325	52	74	33	0	0	5.3	*
C3_165146690	3	120.256	46	72	34	7	4.4	2.32	-
C3_162183284	3	123.401	47	75	35	2	1.3	2.15	-
C3_162183285	3	123.401	47	75	35	2	1.3	2.15	-
C3_165158803	3	124.661	38	91	27	0	0	5.88	*
C3_34385039	3	124.698	31	71	46	11	6.9	3.28	-
C3_34385080	3	124.698	31	71	46	11	6.9	3.28	-
C3_165158881	3	125.587	37	90	29	0	0	4.51	-
C3_165158897	3	125.587	37	90	29	0	0	4.51	-
C3_165158920	3	125.587	37	90	29	0	0	4.51	-
C3_165158921	3	125.587	37	90	29	0	0	4.51	-
C3_164461228	3	127.01	42	84	30	0	0	2.77	-
C3_164461229	3	127.01	42	84	30	0	0	2.77	-
C3_164461232	3	127.01	42	84	30	0	0	2.77	-
C3_164461233	3	127.01	42	84	30	0	0	2.77	-
C3_164461260	3	127.01	42	84	30	0	0	2.77	-
C3_164461264	3	127.01	42	84	30	0	0	2.77	-
C3_164461266	3	127.01	42	84	30	0	0	2.77	-
C3_164461278	3	127.01	42	84	30	0	0	2.77	-
C3_163913417	3	128.151	41	86	29	0	0	3.49	-
C3_163913441	3	128.28	42	84	30	0	0	2.77	-
C3_163913446	3	128.28	42	84	30	0	0	2.77	-
C3_164461121	3	128.601	42	83	31	0	0	2.19	-
C3_164461142	3	128.601	42	83	31	0	0	2.19	-
C3_163108721	3	129.542	42	83	33	1	0.6	1.43	-
C3_163108743	3	129.542	42	83	33	1	0.6	1.43	-
C3_163092912	3	130.285	40	78	38	0	0	0.05	-
C3_160665401	3	131.624	46	81	29	0	0	3.94	-
C3_160665442	3	131.781	46	82	28	0	0	4.56	-
C3_159297379	3	133.489	42	86	30	1	0.6	3.06	-
C3_159297406	3	133.489	42	86	30	1	0.6	3.06	-
C3_159297001	3	134.292	42	83	31	0	0	2.19	-
C3_159297002	3	134.292	42	83	31	0	0	2.19	-
C3_157200492	3	135.143	42	84	30	0	0	2.77	-
C3_157200465	3	135.317	42	85	29	0	0	3.42	-
C3_159461546	3	136.493	50	79	29	1	0.6	5.58	*
C3_159822989	3	137.776	47	69	38	5	3.1	2.71	-
C3_159823014	3	137.776	47	69	38	5	3.1	2.71	-
C3_159823044	3	137.776	47	69	38	5	3.1	2.71	-
C3_157341062	3	140.125	53	63	36	7	4.4	8.25	**
C3_157341096	3	140.125	53	63	36	7	4.4	8.25	**
C3_159824231	3	141.059	52	61	41	5	3.1	8.22	**
C3_157851126	3	142.166	52	68	39	0	0	5.45	*
C3_157851144	3	142.166	52	68	39	0	0	5.45	*
C3_157503051	3	143.933	44	69	45	1	0.6	2.54	-
C3_157503009	3	144.248	44	70	44	1	0.6	2.05	-
C3_157503045	3	144.248	44	70	44	1	0.6	2.05	-
C3_157502775	3	145.372	54	65	38	2	1.3	7.9	**
C3_157572378	3	149.136	47	60	47	5	3.1	7.51	**
C3_157572352	3	149.527	47	61	46	5	3.1	6.66	**
C4_135371377	4	0	49	71	24	15	9.4	8.71	**
C4_130808381	4	1.73	50	65	32	12	7.5	6.37	**
C4_100973513	4	2.063	50	64	28	17	10.7	8.2	**
C4_100973514	4	2.063	50	64	28	17	10.7	8.2	**
C4_146642942	4	2.941	50	71	27	11	6.9	7.39	**
C4_146642974	4	2.941	50	71	27	11	6.9	7.39	**
C4_161891156	4	3.413	43	75	31	10	6.3	1.94	-
C4_137098801	4	4.517	34	67	40	18	11.3	0.86	-
C4_133675342	4	6.93	49	75	28	7	4.4	5.83	*
C4_116018754	4	8.648	52	79	26	2	1.3	8.62	**
C4_116018755	4	8.648	52	79	26	2	1.3	8.62	**
C4_116018775	4	8.648	52	79	26	2	1.3	8.62	**
C4_116018788	4	8.648	52	79	26	2	1.3	8.62	**
C4_133675106	4	9.995	46	88	23	2	1.3	9.04	**
C4_133675123	4	9.995	46	88	23	2	1.3	9.04	**
C4_105310058	4	10.681	44	85	23	7	4.4	7.93	**
C4_112911109	4	10.871	42	53	33	31	19.5	5.05	*
C4_49575393	4	11.081	47	73	29	10	6.3	4.41	-
C4_149758912	4	11.455	46	87	23	3	1.9	8.86	**
C4_149758917	4	11.455	46	87	23	3	1.9	8.86	**
C4_121458939	4	12.769	45	87	24	0	0	7.73	**
C4_121458990	4	12.769	45	87	24	0	0	7.73	**
C4_63041956	4	13.696	39	71	31	18	11.3	0.91	-
C4_63041957	4	13.696	39	71	31	18	11.3	0.91	-
C4_63041979	4	13.696	39	71	31	18	11.3	0.91	-
C4_63041985	4	13.696	39	71	31	18	11.3	0.91	-
C4_63041990	4	13.696	39	71	31	18	11.3	0.91	-
C4_146195603	4	14.894	40	74	36	9	5.7	0.24	-
C4_146195612	4	14.894	40	74	36	9	5.7	0.24	-
C4_146195617	4	14.894	40	74	36	9	5.7	0.24	-
C4_76807772	4	15.671	43	75	34	7	4.4	1.09	-
C4_149230217	4	16.858	51	76	26	6	3.8	8.18	**
C4_118872978	4	17.483	41	89	25	4	2.5	6.72	**
C4_137573550	4	18.314	39	74	22	24	15.1	5.53	*
C4_115050469	4	19.171	39	71	32	17	10.7	0.69	-
C4_115050505	4	19.171	39	71	32	17	10.7	0.69	-
C4_121739504	4	20.537	37	91	28	0	0	5.37	*
C4_129059932	4	20.742	46	75	26	12	7.5	5.5	*
C4_129059934	4	20.742	46	75	26	12	7.5	5.5	*
C4_129059944	4	20.742	46	75	26	12	7.5	5.5	*
C4_129059978	4	20.742	46	75	26	12	7.5	5.5	*
C4_129059982	4	20.742	46	75	26	12	7.5	5.5	*
C4_129059983	4	20.742	46	75	26	12	7.5	5.5	*
C4_136000316	4	21.191	27	88	39	5	3.1	5.01	*
C4_114826355	4	22.689	36	90	30	0	0	4.15	-
C4_60676784	4	23.931	32	96	28	0	0	8.51	**
C4_76435105	4	24.87	31	91	34	0	0	4.45	-
C4_138635076	4	26.079	28	75	35	21	13.2	1.75	-
C4_138635107	4	26.079	28	75	35	21	13.2	1.75	-
C4_138635113	4	26.079	28	75	35	21	13.2	1.75	-
C4_103564101	4	26.969	35	75	36	13	8.2	0.12	-
C4_103564102	4	26.969	35	75	36	13	8.2	0.12	-
C4_103564112	4	26.969	35	75	36	13	8.2	0.12	-
C4_62945519	4	28.296	27	73	43	16	10.1	3.64	-
C4_76151872	4	29.005	30	77	47	5	3.1	3.75	-
C4_76151877	4	29.005	30	77	47	5	3.1	3.75	-
C4_133619367	4	29.573	37	80	34	8	5	0.66	-
C4_103564058	4	30.204	34	85	31	9	5.7	2.79	-
C4_112884385	4	31.165	51	70	38	0	0	4.4	-
C4_133619208	4	31.308	41	77	30	11	6.9	1.88	-
C4_133619231	4	31.308	41	77	30	11	6.9	1.88	-
C4_76807426	4	32.117	39	89	29	2	1.3	4.08	-
C4_76807441	4	32.117	39	89	29	2	1.3	4.08	-
C4_76807474	4	32.117	39	89	29	2	1.3	4.08	-
C4_18601383	4	32.278	51	60	43	5	3.1	8.34	**
C4_115050641	4	33.239	38	75	29	17	10.7	1.59	-
C4_115050650	4	33.239	38	75	29	17	10.7	1.59	-
C4_142482187	4	34.49	41	65	23	30	18.9	5.03	*
C4_137057792	4	35.217	45	82	24	8	5	6.96	**
C4_137057848	4	35.217	45	82	24	8	5	6.96	**
C4_126338293	4	36.279	26	81	34	18	11.3	4.04	-
C4_147291738	4	37.298	29	91	37	2	1.3	4.8	*
C4_147291781	4	37.298	29	91	37	2	1.3	4.8	*
C4_48855758	4	37.709	36	75	34	14	8.8	0.23	-
C4_48855760	4	37.709	36	75	34	14	8.8	0.23	-
C4_76807549	4	38.595	47	76	27	9	5.7	5.36	*
C4_76807591	4	38.595	47	76	27	9	5.7	5.36	*
C4_96303112	4	39.721	30	80	47	2	1.3	3.74	-
C4_149758670	4	40.768	45	82	30	2	1.3	3.18	-
C4_137573693	4	43.661	41	62	35	21	13.2	1.94	-
C4_137573700	4	43.661	41	62	35	21	13.2	1.94	-
C4_137573742	4	43.661	41	62	35	21	13.2	1.94	-
C4_38370605	4	44.036	41	77	28	13	8.2	2.75	-
C4_38370607	4	44.036	41	77	28	13	8.2	2.75	-
C4_38370620	4	44.036	41	77	28	13	8.2	2.75	-
C4_38370626	4	44.036	41	77	28	13	8.2	2.75	-
C4_116152406	4	44.82	42	76	29	12	7.5	2.47	-
C4_62945478	4	46.77	38	84	21	16	10.1	8.41	**
C4_9268583	4	47.722	43	73	20	23	14.5	8.51	**
C4_89827741	4	49.056	40	65	33	21	13.2	1.17	-
C4_90847091	4	50.865	37	64	49	9	5.7	5.15	*
C4_98784380	4	51.519	30	90	34	5	3.1	4.6	-
C4_42972293	4	52.318	25	65	48	21	13.2	8.13	**
C4_176877056	4	53.713	35	66	41	17	10.7	1.21	-
C4_176877067	4	53.713	35	66	41	17	10.7	1.21	-
C4_104330407	4	53.989	42	53	36	28	17.6	5.32	*
C4_104330428	4	53.989	42	53	36	28	17.6	5.32	*
C4_104330458	4	53.989	42	53	36	28	17.6	5.32	*
C4_152507591	4	58.559	29	82	41	7	4.4	2.84	-
C4_5364886	4	59.118	29	73	36	21	13.2	1.17	-
C4_112867140	4	59.371	28	83	37	11	6.9	3.28	-
C4_112867147	4	59.371	28	83	37	11	6.9	3.28	-
C4_112867150	4	59.371	28	83	37	11	6.9	3.28	-
C4_112867153	4	59.371	28	83	37	11	6.9	3.28	-
C4_42972282	4	60.643	37	81	20	21	13.2	8.36	**
C4_152507546	4	63.442	37	81	34	7	4.4	0.78	-
C4_152507594	4	63.442	37	81	34	7	4.4	0.78	-
C4_81049722	4	63.697	43	64	28	24	15.1	3.7	-
C4_81049728	4	63.697	43	64	28	24	15.1	3.7	-
C4_81049736	4	63.697	43	64	28	24	15.1	3.7	-
C4_81049748	4	63.697	43	64	28	24	15.1	3.7	-
C4_19259978	4	63.843	42	71	28	18	11.3	2.79	-
C4_19260002	4	63.843	42	71	28	18	11.3	2.79	-
C4_19260026	4	63.843	42	71	28	18	11.3	2.79	-
C4_19260030	4	63.843	42	71	28	18	11.3	2.79	-
C4_82164828	4	68.463	40	70	37	12	7.5	0.46	-
C4_134058908	4	69.38	40	86	26	7	4.4	5.21	*
C4_110206515	4	69.579	39	63	44	13	8.2	3.08	-
C4_110206525	4	69.579	39	63	44	13	8.2	3.08	-
C4_33747572	4	70.564	46	53	32	28	17.6	7.76	**
C4_112918356	4	73.239	26	77	48	8	5	6.47	**
C4_2519598	4	74.022	48	66	31	14	8.8	5.15	*
C4_2519603	4	74.022	48	66	31	14	8.8	5.15	*
C4_2519641	4	74.022	48	66	31	14	8.8	5.15	*
C4_103453159	4	84.646	48	66	27	18	11.3	6.83	**
C4_78857331	4	87.39	51	70	37	1	0.6	4.53	-
C4_78857336	4	87.39	51	70	37	1	0.6	4.53	-
C4_78857347	4	87.39	51	70	37	1	0.6	4.53	-
C4_78857359	4	87.39	51	70	37	1	0.6	4.53	-
C4_20503593	4	89.302	44	77	35	0	0	1.06	-
C4_20503594	4	89.302	44	77	35	0	0	1.06	-
C4_143505214	4	90.527	49	69	41	0	0	3.58	-
C4_2041870	4	93.215	45	52	39	23	14.5	8.06	**
C4_2041876	4	93.215	45	52	39	23	14.5	8.06	**
C4_2041877	4	93.215	45	52	39	23	14.5	8.06	**
C4_132991560	4	95.115	42	75	39	0	0	0.35	-
C4_132991588	4	95.115	42	75	39	0	0	0.35	-
C4_136317524	4	102.06	42	76	37	4	2.5	0.38	-
C4_136317525	4	102.06	42	76	37	4	2.5	0.38	-
C4_136317526	4	102.06	42	76	37	4	2.5	0.38	-
C4_70220849	4	109.75	32	59	49	19	11.9	7.59	**
C4_70220894	4	109.75	32	59	49	19	11.9	7.59	**
C4_176877043	4	117.342	48	66	28	17	10.7	6.34	**
C5_188768137	5	0	42	59	37	21	13.2	3.26	-
C5_1216998	5	1.898	43	71	45	0	0	1.87	-
C5_1217007	5	1.898	43	71	45	0	0	1.87	-
C5_1217017	5	2.233	44	70	45	0	0	2.28	-
C5_153519099	5	5.208	40	79	27	13	8.2	3.3	-
C5_153519102	5	5.208	40	79	27	13	8.2	3.3	-
C5_153519115	5	5.208	40	79	27	13	8.2	3.3	-
C5_153519117	5	5.208	40	79	27	13	8.2	3.3	-
C5_153519123	5	5.208	40	79	27	13	8.2	3.3	-
C5_1217202	5	5.796	48	66	44	1	0.6	4.48	-
C5_1120164	5	8.217	39	75	42	0	0	0.35	-
C5_1120167	5	8.217	39	75	42	0	0	0.35	-
C5_1120178	5	8.217	39	75	42	0	0	0.35	-
C5_1120182	5	8.217	39	75	42	0	0	0.35	-
C5_23839719	5	10.57	33	67	38	21	13.2	0.48	-
C5_23839721	5	10.57	33	67	38	21	13.2	0.48	-
C5_128104418	5	11.3	36	61	40	22	13.8	1.88	-
C5_128104424	5	11.3	36	61	40	22	13.8	1.88	-
C5_128104465	5	11.3	36	61	40	22	13.8	1.88	-
C5_128104433	5	11.435	37	60	40	22	13.8	2.24	-
C5_158363699	5	12.653	39	65	41	14	8.8	1.61	-
C5_158363733	5	12.653	39	65	41	14	8.8	1.61	-
C5_158363735	5	12.653	39	65	41	14	8.8	1.61	-
C5_158363755	5	12.653	39	65	41	14	8.8	1.61	-
C5_22657730	5	12.884	39	67	33	20	12.6	0.7	-
C5_22657741	5	12.884	39	67	33	20	12.6	0.7	-
C5_22657754	5	12.884	39	67	33	20	12.6	0.7	-
C5_22657757	5	12.884	39	67	33	20	12.6	0.7	-
C5_3776209	5	13.465	41	70	45	3	1.9	1.85	-
C5_23838100	5	13.963	38	74	32	15	9.4	0.61	-
C5_63778457	5	14.83	40	61	31	27	17	1.98	-
C5_63778490	5	14.83	40	61	31	27	17	1.98	-
C5_9023112	5	15.241	36	74	49	0	0	2.89	-
C5_132702848	5	15.847	44	64	34	17	10.7	2.79	-
C5_132702853	5	15.847	44	64	34	17	10.7	2.79	-
C5_53581511	5	16.045	36	73	35	15	9.4	0.04	-
C5_53581534	5	16.045	36	73	35	15	9.4	0.04	-
C5_53581550	5	16.045	36	73	35	15	9.4	0.04	-
C5_89427969	5	16.197	39	73	26	21	13.2	2.91	-
C5_97098873	5	16.578	32	70	27	30	18.9	1.33	-
C5_97098898	5	16.578	32	70	27	30	18.9	1.33	-
C5_97098901	5	16.578	32	70	27	30	18.9	1.33	-
C5_120731342	5	17.157	41	82	26	10	6.3	4.53	-
C5_120731343	5	17.157	41	82	26	10	6.3	4.53	-
C5_120731364	5	17.157	41	82	26	10	6.3	4.53	-
C5_120731375	5	17.157	41	82	26	10	6.3	4.53	-
C5_120731376	5	17.157	41	82	26	10	6.3	4.53	-
C5_2458496	5	17.389	40	79	37	0	0	0.14	-
C5_196088438	5	17.774	32	82	31	14	8.8	2.5	-
C5_196088465	5	17.774	32	82	31	14	8.8	2.5	-
C5_137211685	5	17.994	40	76	28	15	9.4	2.44	-
C5_137211707	5	17.994	40	76	28	15	9.4	2.44	-
C5_137211719	5	17.994	40	76	28	15	9.4	2.44	-
C5_137211721	5	17.994	40	76	28	15	9.4	2.44	-
C5_198159130	5	18.466	36	73	39	11	6.9	0.15	-
C5_198159138	5	18.466	36	73	39	11	6.9	0.15	-
C5_198159156	5	18.466	36	73	39	11	6.9	0.15	-
C5_57165558	5	18.632	36	71	40	12	7.5	0.39	-
C5_52690110	5	19.153	34	82	29	14	8.8	2.83	-
C5_52690132	5	19.153	34	82	29	14	8.8	2.83	-
C5_52690144	5	19.153	34	82	29	14	8.8	2.83	-
C5_183688980	5	19.817	40	71	34	14	8.8	0.56	-
C5_183688988	5	19.817	40	71	34	14	8.8	0.56	-
C5_166826513	5	20.323	36	79	32	12	7.5	1.04	-
C5_147126585	5	20.807	28	87	35	9	5.7	4.49	-
C5_147126612	5	20.807	28	87	35	9	5.7	4.49	-
C5_123155507	5	20.952	36	79	31	13	8.2	1.33	-
C5_85713160	5	21.376	37	80	28	14	8.8	2.67	-
C5_44061240	5	21.682	34	86	28	11	6.9	4.38	-
C5_55959009	5	21.841	40	81	26	12	7.5	4.2	-
C5_55959063	5	21.841	40	81	26	12	7.5	4.2	-
C5_55959067	5	21.841	40	81	26	12	7.5	4.2	-
C5_129464128	5	22.246	30	82	30	17	10.7	3.41	-
C5_154450421	5	22.494	28	84	36	11	6.9	3.57	-
C5_110809681	5	23.23	32	75	34	18	11.3	0.63	-
C5_161607290	5	23.956	39	80	28	12	7.5	2.8	-
C5_161607323	5	23.956	39	80	28	12	7.5	2.8	-
C5_26602016	5	24.907	39	81	31	8	5	1.65	-
C5_26602034	5	24.907	39	81	31	8	5	1.65	-
C5_119152268	5	25.327	41	80	28	10	6.3	3.08	-
C5_198227014	5	25.83	38	83	27	11	6.9	3.82	-
C5_198227026	5	25.83	38	83	27	11	6.9	3.82	-
C5_198227038	5	25.83	38	83	27	11	6.9	3.82	-
C5_178174572	5	26.648	44	63	32	20	12.6	3.29	-
C5_178174575	5	26.648	44	63	32	20	12.6	3.29	-
C5_23843404	5	26.809	29	83	37	10	6.3	2.8	-
C5_136726164	5	28.304	44	81	28	6	3.8	3.88	-
C5_136726178	5	28.304	44	81	28	6	3.8	3.88	-
C5_136726220	5	28.304	44	81	28	6	3.8	3.88	-
C5_26503611	5	28.994	39	85	27	8	5	4.3	-
C5_19662878	5	30.085	41	75	40	0	0	0.24	-
C5_53758348	5	30.911	41	74	42	2	1.3	0.53	-
C5_53758362	5	30.911	41	74	42	2	1.3	0.53	-
C5_22385577	5	31.951	42	75	41	1	0.6	0.42	-
C5_20922091	5	32.128	46	68	45	0	0	3.34	-
C5_20902840	5	32.556	50	72	37	0	0	3.54	-
C5_45510635	5	33.099	38	71	38	12	7.5	0.17	-
C5_20413155	5	33.978	38	78	40	0	0	0.05	-
C5_20413162	5	33.978	38	78	40	0	0	0.05	-
C5_20413196	5	33.978	38	78	40	0	0	0.05	-
C5_20413198	5	33.978	38	78	40	0	0	0.05	-
C5_20914479	5	34.278	44	74	41	0	0	0.87	-
C5_20914506	5	34.278	44	74	41	0	0	0.87	-
C5_108418190	5	35.205	30	82	44	0	0	2.92	-
C5_15623202	5	36.218	36	80	31	12	7.5	1.49	-
C5_156013893	5	36.415	47	65	44	3	1.9	4.45	-
C5_218284052	5	36.506	40	85	31	3	1.9	2.29	-
C5_218284058	5	36.506	40	85	31	3	1.9	2.29	-
C5_181831196	5	36.764	45	66	47	1	0.6	4.33	-
C5_34050944	5	37.391	47	66	40	6	3.8	3.52	-
C5_27424479	5	37.691	42	75	39	0	0	0.35	-
C5_27424490	5	37.691	42	75	39	0	0	0.35	-
C5_27337257	5	37.974	39	79	38	0	0	0.04	-
C5_37919249	5	38.2	45	76	35	0	0	1.38	-
C5_182558469	5	38.425	39	68	47	5	3.1	2.94	-
C5_182558511	5	38.425	39	68	47	5	3.1	2.94	-
C5_182558513	5	38.425	39	68	47	5	3.1	2.94	-
C5_200420823	5	38.783	45	67	45	2	1.3	3.37	-
C5_200420835	5	38.783	45	67	45	2	1.3	3.37	-
C5_200420855	5	38.783	45	67	45	2	1.3	3.37	-
C5_200420859	5	38.783	45	67	45	2	1.3	3.37	-
C5_161818507	5	38.972	44	69	43	3	1.9	2.09	-
C5_4800715	5	38.999	44	65	39	11	6.9	2.53	-
C5_4800741	5	38.999	44	65	39	11	6.9	2.53	-
C5_30642736	5	39.203	41	76	39	0	0	0.15	-
C5_30642738	5	39.203	41	76	39	0	0	0.15	-
C5_30642740	5	39.203	41	76	39	0	0	0.15	-
C5_31081234	5	39.292	42	76	38	0	0	0.31	-
C5_36975862	5	39.523	43	72	41	3	1.9	0.97	-
C5_123382849	5	39.649	49	67	42	1	0.6	4.27	-
C5_177716256	5	39.935	40	74	45	0	0	1.08	-
C5_177716287	5	39.935	40	74	45	0	0	1.08	-
C5_157712847	5	40.043	44	70	43	2	1.3	1.85	-
C5_156240782	5	40.169	47	69	41	2	1.3	2.76	-
C5_156240803	5	40.169	47	69	41	2	1.3	2.76	-
C5_19482348	5	40.23	44	79	34	2	1.3	1.28	-
C5_8253274	5	40.246	38	65	43	13	8.2	2.1	-
C5_31081378	5	40.417	41	79	36	0	0	0.35	-
C5_31081380	5	40.417	41	79	36	0	0	0.35	-
C5_31081394	5	40.417	41	79	36	0	0	0.35	-
C5_91234726	5	40.527	47	65	43	4	2.5	4.24	-
C5_91234733	5	40.527	47	65	43	4	2.5	4.24	-
C5_79737468	5	40.644	49	68	42	0	0	3.94	-
C5_32097133	5	40.806	43	75	38	0	0	0.55	-
C5_189195086	5	40.939	45	71	41	2	1.3	1.64	-
C5_134275916	5	41.067	46	71	42	0	0	2.02	-
C5_5576345	5	41.163	29	85	38	7	4.4	3.2	-
C5_83675698	5	41.189	47	69	42	1	0.6	2.85	-
C5_129184436	5	41.422	48	69	42	0	0	3.23	-
C5_129184437	5	41.422	48	69	42	0	0	3.23	-
C5_129184457	5	41.422	48	69	42	0	0	3.23	-
C5_68076346	5	41.543	48	70	41	0	0	2.89	-
C5_68076351	5	41.543	48	70	41	0	0	2.89	-
C5_71894474	5	41.647	48	70	40	1	0.6	2.86	-
C5_147075522	5	41.804	42	67	44	6	3.8	2.41	-
C5_147075529	5	41.804	42	67	44	6	3.8	2.41	-
C5_147075537	5	41.804	42	67	44	6	3.8	2.41	-
C5_147075539	5	41.804	42	67	44	6	3.8	2.41	-
C5_147075563	5	41.804	42	67	44	6	3.8	2.41	-
C5_73704882	5	41.908	45	69	43	2	1.3	2.35	-
C5_108334782	5	42.009	47	74	37	1	0.6	1.9	-
C5_166041943	5	42.119	45	73	41	0	0	1.26	-
C5_168689986	5	42.254	44	72	40	0	0	1.13	-
C5_168689989	5	42.254	44	72	40	0	0	1.13	-
C5_6922833	5	42.368	40	79	39	1	0.6	0.01	-
C5_183835407	5	42.391	43	76	39	1	0.6	0.43	-
C5_183835409	5	42.391	43	76	39	1	0.6	0.43	-
C5_163224519	5	42.458	44	73	39	0	0	0.96	-
C5_199273127	5	42.603	40	71	42	6	3.8	0.84	-
C5_82958615	5	42.677	50	71	38	0	0	3.63	-
C5_179369829	5	42.717	40	74	42	0	0	0.46	-
C5_179369838	5	42.717	40	74	42	0	0	0.46	-
C5_179369844	5	42.717	40	74	42	0	0	0.46	-
C5_179369853	5	42.717	40	74	42	0	0	0.46	-
C5_179369859	5	42.717	40	74	42	0	0	0.46	-
C5_117812272	5	42.86	45	71	41	2	1.3	1.64	-
C5_117812292	5	42.86	45	71	41	2	1.3	1.64	-
C5_117812295	5	42.86	45	71	41	2	1.3	1.64	-
C5_135541207	5	42.935	45	74	37	0	0	1.23	-
C5_78839007	5	43.089	50	72	36	1	0.6	3.72	-
C5_183732180	5	43.231	43	74	39	0	0	0.62	-
C5_37845299	5	43.327	41	79	36	0	0	0.35	-
C5_42021429	5	43.403	45	73	41	0	0	1.26	-
C5_71894307	5	43.527	48	74	37	0	0	2.28	-
C5_132673914	5	43.607	45	74	40	0	0	1.08	-
C5_53121449	5	43.658	45	73	41	0	0	1.26	-
C5_120729352	5	43.762	44	75	37	0	0	0.86	-
C5_202204826	5	43.801	45	82	29	0	0	3.69	-
C5_53121496	5	43.825	44	74	41	0	0	0.87	-
C5_53121094	5	43.884	44	74	41	0	0	0.87	-
C5_151346520	5	43.995	46	74	39	0	0	1.38	-
C5_151346546	5	43.995	46	74	39	0	0	1.38	-
C5_151346553	5	43.995	46	74	39	0	0	1.38	-
C5_42547548	5	44.047	43	74	39	0	0	0.62	-
C5_42547561	5	44.047	43	74	39	0	0	0.62	-
C5_42547566	5	44.047	43	74	39	0	0	0.62	-
C5_42547573	5	44.047	43	74	39	0	0	0.62	-
C5_42547575	5	44.047	43	74	39	0	0	0.62	-
C5_42021350	5	44.075	44	74	38	0	0	0.87	-
C5_132673740	5	44.142	42	75	39	0	0	0.35	-
C5_132673754	5	44.142	42	75	39	0	0	0.35	-
C5_132673779	5	44.142	42	75	39	0	0	0.35	-
C5_132673783	5	44.142	42	75	39	0	0	0.35	-
C5_132673786	5	44.142	42	75	39	0	0	0.35	-
C5_42313708	5	44.192	45	74	37	0	0	1.23	-
C5_42313724	5	44.192	45	74	37	0	0	1.23	-
C5_42313747	5	44.192	45	74	37	0	0	1.23	-
C5_42313751	5	44.192	45	74	37	0	0	1.23	-
C5_42313758	5	44.192	45	74	37	0	0	1.23	-
C5_123844565	5	44.317	45	74	40	0	0	1.08	-
C5_123844567	5	44.317	45	74	40	0	0	1.08	-
C5_123844575	5	44.317	45	74	40	0	0	1.08	-
C5_123844596	5	44.317	45	74	40	0	0	1.08	-
C5_68076200	5	44.381	45	74	37	0	0	1.23	-
C5_47070841	5	44.492	44	75	37	0	0	0.86	-
C5_47070842	5	44.492	44	75	37	0	0	0.86	-
C5_47070894	5	44.492	44	75	37	0	0	0.86	-
C5_95305163	5	44.548	43	76	37	0	0	0.56	-
C5_53792718	5	44.584	43	76	37	0	0	0.56	-
C5_73331139	5	44.626	44	76	36	0	0	0.92	-
C5_60888001	5	44.661	43	77	36	0	0	0.65	-
C5_60888009	5	44.661	43	77	36	0	0	0.65	-
C5_60888035	5	44.661	43	77	36	0	0	0.65	-
C5_60888044	5	44.661	43	77	36	0	0	0.65	-
C5_108418312	5	44.709	42	78	36	0	0	0.46	-
C5_108418328	5	44.709	42	78	36	0	0	0.46	-
C5_121661941	5	44.745	42	78	36	0	0	0.46	-
C5_121661959	5	44.745	42	78	36	0	0	0.46	-
C5_104338003	5	44.789	43	77	36	0	0	0.65	-
C5_151346428	5	44.815	44	76	36	0	0	0.92	-
C5_7073910	5	44.82	40	82	35	2	1.3	0.63	-
C5_95305182	5	44.826	42	79	35	0	0	0.65	-
C5_95305188	5	44.826	42	79	35	0	0	0.65	-
C5_95305198	5	44.826	42	79	35	0	0	0.65	-
C5_106518635	5	44.837	44	78	36	1	0.6	0.84	-
C5_106518660	5	44.837	44	78	36	1	0.6	0.84	-
C5_100021832	5	44.866	44	77	35	0	0	1.06	-
C5_100021771	5	44.904	44	78	34	0	0	1.28	-
C5_86052491	5	44.945	45	76	35	0	0	1.38	-
C5_147418439	5	44.973	43	76	37	0	0	0.56	-
C5_147418451	5	44.973	43	76	37	0	0	0.56	-
C5_121661866	5	45.023	43	77	36	0	0	0.65	-
C5_121661899	5	45.023	43	77	36	0	0	0.65	-
C5_129013845	5	45.082	42	76	38	0	0	0.31	-
C5_129013855	5	45.082	42	76	38	0	0	0.31	-
C5_129013882	5	45.082	42	76	38	0	0	0.31	-
C5_117812368	5	45.105	43	75	40	1	0.6	0.52	-
C5_117812370	5	45.105	43	75	40	1	0.6	0.52	-
C5_117812389	5	45.105	43	75	40	1	0.6	0.52	-
C5_117812412	5	45.105	43	75	40	1	0.6	0.52	-
C5_146617350	5	45.171	43	77	36	0	0	0.65	-
C5_140006159	5	45.238	45	76	35	0	0	1.38	-
C5_140006160	5	45.238	45	76	35	0	0	1.38	-
C5_140006168	5	45.238	45	76	35	0	0	1.38	-
C5_146416278	5	45.3	44	76	36	0	0	0.92	-
C5_86146775	5	45.364	45	74	37	0	0	1.23	-
C5_86146787	5	45.364	45	74	37	0	0	1.23	-
C5_86146798	5	45.364	45	74	37	0	0	1.23	-
C5_57488698	5	45.467	38	83	35	0	0	0.76	-
C5_76761110	5	45.51	44	74	38	0	0	0.87	-
C5_47070730	5	45.563	45	74	40	0	0	1.08	-
C5_47070760	5	45.563	45	74	40	0	0	1.08	-
C5_82023943	5	45.622	45	74	40	0	0	1.08	-
C5_82023986	5	45.622	45	74	40	0	0	1.08	-
C5_48020720	5	45.757	47	75	34	0	0	2.4	-
C5_61989211	5	45.849	47	73	39	0	0	1.87	-
C5_61989223	5	45.849	47	73	39	0	0	1.87	-
C5_61989225	5	45.849	47	73	39	0	0	1.87	-
C5_61989226	5	45.849	47	73	39	0	0	1.87	-
C5_61989258	5	45.849	47	73	39	0	0	1.87	-
C5_115309243	5	45.923	42	74	40	0	0	0.46	-
C5_115309246	5	45.923	42	74	40	0	0	0.46	-
C5_115309247	5	45.923	42	74	40	0	0	0.46	-
C5_152007078	5	45.994	41	79	36	0	0	0.35	-
C5_211076416	5	46.007	34	89	35	1	0.6	2.54	-
C5_103129630	5	46.069	48	73	38	0	0	2.32	-
C5_103129664	5	46.069	48	73	38	0	0	2.32	-
C5_103129674	5	46.069	48	73	38	0	0	2.32	-
C5_103129675	5	46.069	48	73	38	0	0	2.32	-
C5_103129676	5	46.069	48	73	38	0	0	2.32	-
C5_103129679	5	46.069	48	73	38	0	0	2.32	-
C5_78258072	5	46.164	45	73	41	0	0	1.26	-
C5_78258081	5	46.164	45	73	41	0	0	1.26	-
C5_42016787	5	46.229	46	73	40	0	0	1.52	-
C5_129013945	5	46.433	45	73	41	0	0	1.26	-
C5_42016563	5	46.484	46	69	42	2	1.3	2.5	-
C5_91258417	5	46.64	48	71	40	0	0	2.62	-
C5_104709888	5	46.759	50	73	36	0	0	3.53	-
C5_104709889	5	46.759	50	73	36	0	0	3.53	-
C5_104709919	5	46.759	50	73	36	0	0	3.53	-
C5_104709930	5	46.759	50	73	36	0	0	3.53	-
C5_115383381	5	46.882	47	70	42	0	0	2.58	-
C5_115383387	5	46.882	47	70	42	0	0	2.58	-
C5_115383392	5	46.882	47	70	42	0	0	2.58	-
C5_115383400	5	46.882	47	70	42	0	0	2.58	-
C5_66035034	5	46.987	46	70	42	1	0.6	2.25	-
C5_57792111	5	47.057	46	71	41	1	0.6	1.94	-
C5_135992983	5	47.185	47	70	42	0	0	2.58	-
C5_135992987	5	47.185	47	70	42	0	0	2.58	-
C5_135993031	5	47.185	47	70	42	0	0	2.58	-
C5_134301721	5	47.272	44	72	41	2	1.3	1.19	-
C5_134301753	5	47.272	44	72	41	2	1.3	1.19	-
C5_134301758	5	47.272	44	72	41	2	1.3	1.19	-
C5_3142408	5	47.447	33	83	40	0	0	1.27	-
C5_166103313	5	47.484	41	78	37	0	0	0.21	-
C5_185062921	5	47.539	40	79	37	0	0	0.14	-
C5_188730919	5	47.636	43	79	36	1	0.6	0.62	-
C5_188730933	5	47.636	43	79	36	1	0.6	0.62	-
C5_199694722	5	47.714	41	77	38	0	0	0.14	-
C5_199694745	5	47.714	41	77	38	0	0	0.14	-
C5_197076581	5	47.782	41	79	38	1	0.6	0.11	-
C5_197076605	5	47.782	41	79	38	1	0.6	0.11	-
C5_197076611	5	47.782	41	79	38	1	0.6	0.11	-
C5_164082541	5	47.842	41	77	38	0	0	0.14	-
C5_166103377	5	47.917	40	80	36	0	0	0.31	-
C5_163964807	5	48.021	42	77	37	0	0	0.35	-
C5_163964823	5	48.021	42	77	37	0	0	0.35	-
C5_163964828	5	48.021	42	77	37	0	0	0.35	-
C5_197574056	5	48.107	43	75	38	0	0	0.55	-
C5_197574085	5	48.107	43	75	38	0	0	0.55	-
C5_197574094	5	48.107	43	75	38	0	0	0.55	-
C5_163768706	5	48.157	40	78	38	0	0	0.05	-
C5_164870244	5	48.183	39	80	30	10	6.3	1.9	-
C5_188731816	5	48.315	41	77	38	0	0	0.14	-
C5_188731837	5	48.315	41	77	38	0	0	0.14	-
C5_175015427	5	48.45	37	84	35	0	0	0.97	-
C5_188731757	5	48.459	44	74	38	0	0	0.87	-
C5_33444945	5	48.565	47	71	41	0	0	2.27	-
C5_33444951	5	48.565	47	71	41	0	0	2.27	-
C5_196192780	5	48.61	42	74	40	0	0	0.46	-
C5_196192805	5	48.61	42	74	40	0	0	0.46	-
C5_162745893	5	48.671	48	73	38	0	0	2.32	-
C5_190738398	5	48.732	40	74	41	4	2.5	0.33	-
C5_181830965	5	48.889	42	72	42	0	0	0.92	-
C5_181830993	5	48.889	42	72	42	0	0	0.92	-
C5_140171044	5	49.012	43	69	46	1	0.6	2.65	-
C5_157951257	5	49.129	49	73	37	0	0	2.87	-
C5_153915713	5	49.287	40	75	43	1	0.6	0.52	-
C5_196192960	5	49.403	43	73	40	0	0	0.76	-
C5_196192964	5	49.403	43	73	40	0	0	0.76	-
C5_196192972	5	49.403	43	73	40	0	0	0.76	-
C5_135993134	5	49.577	49	67	43	0	0	4.38	-
C5_135993138	5	49.577	49	67	43	0	0	4.38	-
C5_135993180	5	49.577	49	67	43	0	0	4.38	-
C5_80723364	5	49.658	46	67	44	2	1.3	3.42	-
C5_162764136	5	49.822	43	76	37	0	0	0.56	-
C5_162764157	5	49.822	43	76	37	0	0	0.56	-
C5_7793714	5	50.016	35	79	41	4	2.5	0.52	-
C5_189113546	5	50.086	42	77	39	1	0.6	0.22	-
C5_143475156	5	50.268	40	65	48	6	3.8	4.29	-
C5_34594218	5	50.525	45	71	42	1	0.6	1.73	-
C5_166041770	5	50.684	47	71	41	0	0	2.27	-
C5_166041791	5	50.684	47	71	41	0	0	2.27	-
C5_168870028	5	50.873	51	71	37	0	0	4.28	-
C5_168870081	5	50.873	51	71	37	0	0	4.28	-
C5_175015549	5	51.093	36	84	37	2	1.3	0.78	-
C5_112819809	5	51.216	46	66	44	3	1.9	3.74	-
C5_112819817	5	51.216	46	66	44	3	1.9	3.74	-
C5_112819831	5	51.216	46	66	44	3	1.9	3.74	-
C5_99212952	5	51.388	43	76	39	1	0.6	0.43	-
C5_99212983	5	51.388	43	76	39	1	0.6	0.43	-
C5_34594404	5	51.744	48	69	40	2	1.3	3.11	-
C5_138200128	5	51.841	42	62	45	10	6.3	4.32	-
C5_138200141	5	51.841	42	62	45	10	6.3	4.32	-
C5_138200155	5	51.841	42	62	45	10	6.3	4.32	-
C5_160773685	5	52.084	46	68	45	0	0	3.34	-
C5_166045011	5	52.31	44	68	42	5	3.1	2.16	-
C5_194820372	5	52.638	44	68	42	5	3.1	2.16	-
C5_194820396	5	52.638	44	68	42	5	3.1	2.16	-
C5_156240613	5	52.877	49	69	40	1	0.6	3.56	-
C5_8120281	5	52.921	39	81	38	1	0.6	0.11	-
C5_162609147	5	53.202	47	69	43	0	0	2.97	-
C5_170573356	5	53.383	47	65	44	3	1.9	4.45	-
C5_170573357	5	53.383	47	65	44	3	1.9	4.45	-
C5_170573381	5	53.383	47	65	44	3	1.9	4.45	-
C5_170573401	5	53.383	47	65	44	3	1.9	4.45	-
C5_180554395	5	53.641	40	65	47	7	4.4	3.83	-
C5_167012195	5	54.04	44	67	47	1	0.6	3.76	-
C5_167012196	5	54.04	44	67	47	1	0.6	3.76	-
C5_192232608	5	54.191	41	61	44	13	8.2	4.07	-
C5_205948929	5	54.568	46	72	41	0	0	1.73	-
C5_205948931	5	54.568	46	72	41	0	0	1.73	-
C5_4928392	5	54.963	42	72	28	17	10.7	2.79	-
C5_3998843	5	55.62	48	72	32	7	4.4	3.79	-
C5_7073738	5	57.098	44	74	38	0	0	0.87	-
C5_7073745	5	57.098	44	74	38	0	0	0.87	-
C5_7073778	5	57.098	44	74	38	0	0	0.87	-
C5_32072533	5	59.459	39	61	43	16	10.1	3.31	-
C5_32072564	5	59.459	39	61	43	16	10.1	3.31	-
C5_32072572	5	59.459	39	61	43	16	10.1	3.31	-
C5_6565504	5	59.977	47	66	39	7	4.4	3.47	-
C5_44155908	5	60.001	41	76	32	10	6.3	1.15	-
C5_44155911	5	60.001	41	76	32	10	6.3	1.15	-
C5_210436131	5	62.565	41	80	35	0	0	0.56	-
C5_210628193	5	63.297	42	69	47	1	0.6	2.85	-
C5_211589689	5	63.402	42	76	38	0	0	0.31	-
C5_166971020	5	64.225	37	85	34	3	1.9	1.37	-
C5_75030786	5	65.2	46	76	33	4	2.5	2.24	-
C5_75030800	5	65.2	46	76	33	4	2.5	2.24	-
C5_75030804	5	65.2	46	76	33	4	2.5	2.24	-
C5_75030828	5	65.2	46	76	33	4	2.5	2.24	-
C5_45815572	5	65.497	37	55	36	31	19.5	2.55	-
C5_47476019	5	65.722	49	73	31	6	3.8	4.56	-
C5_182054212	5	66.19	42	80	33	4	2.5	1.21	-
C5_41009265	5	66.303	34	76	31	18	11.3	0.99	-
C5_63317453	5	66.69	42	73	40	4	2.5	0.57	-
C5_63317454	5	66.69	42	73	40	4	2.5	0.57	-
C5_138977966	5	67.065	45	75	35	4	2.5	1.45	-
C5_138977978	5	67.065	45	75	35	4	2.5	1.45	-
C5_43659107	5	67.191	28	80	44	7	4.4	3.79	-
C5_165739603	5	67.213	46	70	36	7	4.4	2.26	-
C5_164283858	5	67.982	31	84	29	15	9.4	4.06	-
C5_87490781	5	68.929	35	69	31	24	15.1	0.3	-
C5_87490784	5	68.929	35	69	31	24	15.1	0.3	-
C5_92455434	5	69.304	43	70	42	4	2.5	1.46	-
C5_92455459	5	69.304	43	70	42	4	2.5	1.46	-
C5_87954710	5	69.832	45	67	36	11	6.9	2.42	-
C5_87954716	5	69.832	45	67	36	11	6.9	2.42	-
C5_87954746	5	69.832	45	67	36	11	6.9	2.42	-
C5_41009237	5	70.025	28	80	33	18	11.3	2.91	-
C5_27049721	5	70.322	36	78	27	18	11.3	2.74	-
C5_2517940	5	70.978	37	80	37	5	3.1	0.23	-
C5_112305943	5	71.597	37	76	32	14	8.8	0.68	-
C5_46857873	5	72.196	38	68	32	21	13.2	0.55	-
C5_103454421	5	73.859	44	72	28	15	9.4	3.56	-
C5_103454422	5	73.859	44	72	28	15	9.4	3.56	-
C5_103454427	5	73.859	44	72	28	15	9.4	3.56	-
C5_143646742	5	74.295	31	64	45	19	11.9	3.83	-
C5_143646751	5	74.295	31	64	45	19	11.9	3.83	-
C5_172260308	5	74.47	30	84	32	13	8.2	3.37	-
C5_53861582	5	75.116	46	72	31	10	6.3	3.19	-
C5_41911516	5	75.603	28	80	33	18	11.3	2.91	-
C5_74637552	5	76.373	45	67	32	15	9.4	3.04	-
C5_74637559	5	76.373	45	67	32	15	9.4	3.04	-
C5_74637570	5	76.373	45	67	32	15	9.4	3.04	-
C5_207416509	5	76.703	38	79	31	11	6.9	1.34	-
C5_207416541	5	76.703	38	79	31	11	6.9	1.34	-
C5_207416542	5	76.703	38	79	31	11	6.9	1.34	-
C5_207416556	5	76.703	38	79	31	11	6.9	1.34	-
C5_30922257	5	79.015	43	65	29	22	13.8	3.22	-
C5_132702863	5	81.313	36	66	40	17	10.7	0.93	-
C5_132702880	5	81.313	36	66	40	17	10.7	0.93	-
C5_68486714	5	83.1	43	69	35	12	7.5	1.42	-
C5_68486725	5	83.1	43	69	35	12	7.5	1.42	-
C5_68486729	5	83.1	43	69	35	12	7.5	1.42	-
C5_158370166	5	83.223	42	64	31	22	13.8	2.36	-
C5_14039863	5	83.278	35	77	40	7	4.4	0.36	-
C5_62732749	5	85.495	37	81	29	12	7.5	2.4	-
C5_178940632	5	87.289	37	76	26	20	12.6	2.96	-
C5_157450724	5	90.774	42	72	25	20	12.6	4.34	-
C5_157450750	5	90.774	42	72	25	20	12.6	4.34	-
C5_110138235	5	91.672	41	73	25	20	12.6	4.04	-
C5_110138238	5	91.672	41	73	25	20	12.6	4.04	-
C5_110138242	5	91.672	41	73	25	20	12.6	4.04	-
C5_110138251	5	91.672	41	73	25	20	12.6	4.04	-
C5_110138262	5	91.672	41	73	25	20	12.6	4.04	-
C5_110138286	5	91.672	41	73	25	20	12.6	4.04	-
C5_48368022	5	101.152	35	65	28	31	19.5	0.8	-
C5_48368052	5	101.152	35	65	28	31	19.5	0.8	-
C5_48368057	5	101.152	35	65	28	31	19.5	0.8	-
C5_62732790	5	107.389	35	80	32	12	7.5	1.27	-
C5_199178733	5	111.069	34	65	44	16	10.1	2.58	-
C5_199178743	5	111.069	34	65	44	16	10.1	2.58	-
C6_80915080	6	0	44	72	28	15	9.4	3.56	-
C6_80915098	6	0	44	72	28	15	9.4	3.56	-
C6_6832430	6	8.466	41	66	28	24	15.1	2.57	-
C6_6832458	6	8.466	41	66	28	24	15.1	2.57	-
C6_31839618	6	16.346	44	73	25	17	10.7	5.2	*
C6_5701209	6	18.168	38	84	28	9	5.7	3.49	-
C6_5701221	6	18.168	38	84	28	9	5.7	3.49	-
C6_5701230	6	18.168	38	84	28	9	5.7	3.49	-
C6_8433087	6	22.229	28	75	46	10	6.3	4.36	-
C6_78289542	6	24.598	39	83	31	6	3.8	1.94	-
C6_83474175	6	31.117	45	64	29	21	13.2	4.43	-
C6_96739631	6	35.991	43	73	27	16	10.1	3.64	-
C6_63798459	6	37.544	42	78	28	11	6.9	3.08	-
C6_63798504	6	37.544	42	78	28	11	6.9	3.08	-
C6_5702968	6	41.889	52	70	35	2	1.3	5.52	*
C6_5702971	6	41.889	52	70	35	2	1.3	5.52	*
C6_102313276	6	43.971	43	60	29	27	17	4.06	-
C6_102313279	6	43.971	43	60	29	27	17	4.06	-
C6_102313282	6	43.971	43	60	29	27	17	4.06	-
C6_102313293	6	43.971	43	60	29	27	17	4.06	-
C6_102313306	6	43.971	43	60	29	27	17	4.06	-
C6_6001429	6	44.276	49	75	32	0	0	3.94	-
C6_96507823	6	47.163	31	87	29	12	7.5	5.01	*
C6_96507840	6	47.163	31	87	29	12	7.5	5.01	*
C6_68528613	6	50.136	30	71	39	19	11.9	1.19	-
C6_2284901	6	51.885	46	71	42	0	0	2.02	-
C6_2284916	6	51.885	46	71	42	0	0	2.02	-
C6_5572907	6	54.197	36	76	34	13	8.2	0.3	-
C6_96657229	6	54.216	41	70	33	15	9.4	1	-
C6_96657262	6	54.216	41	70	33	15	9.4	1	-
C6_96657276	6	54.216	41	70	33	15	9.4	1	-
C6_3348714	6	54.546	42	81	33	0	0	1.27	-
C6_2284741	6	56.374	43	74	39	0	0	0.62	-
C6_2284742	6	56.374	43	74	39	0	0	0.62	-
C6_2284791	6	56.374	43	74	39	0	0	0.62	-
C6_1527409	6	59.932	34	81	41	0	0	0.86	-
C6_1527432	6	59.932	34	81	41	0	0	0.86	-
C6_287219	6	62.045	41	78	37	0	0	0.21	-
C6_287245	6	62.045	41	78	37	0	0	0.21	-
C6_287267	6	62.045	41	78	37	0	0	0.21	-
C6_43528231	6	62.906	46	71	26	16	10.1	5.6	*
C6_43528234	6	62.906	46	71	26	16	10.1	5.6	*
C6_43528236	6	62.906	46	71	26	16	10.1	5.6	*
C6_180232	6	64.238	42	70	34	13	8.2	1.12	-
C6_180236	6	64.238	42	70	34	13	8.2	1.12	-
C6_180239	6	64.238	42	70	34	13	8.2	1.12	-
C6_180256	6	64.238	42	70	34	13	8.2	1.12	-
C6_41097197	6	66.275	40	66	24	29	18.2	3.97	-
C6_95954689	6	67.16	46	63	40	10	6.3	4.03	-
C6_95954704	6	67.16	46	63	40	10	6.3	4.03	-
C6_180310	6	67.44	42	68	37	12	7.5	1.16	-
C6_180347	6	67.44	42	68	37	12	7.5	1.16	-
C6_23657364	6	72.246	41	64	26	28	17.6	3.5	-
C6_23657402	6	72.246	41	64	26	28	17.6	3.5	-
C6_23657417	6	72.246	41	64	26	28	17.6	3.5	-
C6_23657420	6	72.246	41	64	26	28	17.6	3.5	-
C6_6644711	6	78.933	43	63	35	18	11.3	2.5	-
C6_6644720	6	78.933	43	63	35	18	11.3	2.5	-
C6_6644721	6	78.933	43	63	35	18	11.3	2.5	-
C6_81082379	6	80.725	39	74	33	13	8.2	0.52	-
C6_41315290	6	82.85	38	82	28	11	6.9	3.08	-
C6_41315291	6	82.85	38	82	28	11	6.9	3.08	-
C6_91037843	6	91.242	37	69	34	19	11.9	0.16	-
C6_91037878	6	91.242	37	69	34	19	11.9	0.16	-
C6_38494389	6	94.776	32	66	45	16	10.1	3.21	-
C6_38494398	6	94.776	32	66	45	16	10.1	3.21	-
C6_96553036	6	106.936	37	67	34	21	13.2	0.25	-
C6_80915093	6	126.79	30	72	42	15	9.4	2	-
C6_80915107	6	127.512	29	72	43	15	9.4	2.72	-
C7_45084034	7	0	30	72	40	17	10.7	1.44	-
C7_70986995	7	3.077	29	70	43	17	10.7	2.79	-
C7_62614207	7	5.359	32	74	36	17	10.7	0.48	-
C7_62614227	7	5.359	32	74	36	17	10.7	0.48	-
C7_62614230	7	5.359	32	74	36	17	10.7	0.48	-
C7_31772845	7	6.705	40	81	26	12	7.5	4.2	-
C7_93820264	7	6.739	37	62	34	26	16.4	0.74	-
C7_93820277	7	6.739	37	62	34	26	16.4	0.74	-
C7_93820293	7	6.739	37	62	34	26	16.4	0.74	-
C7_93820294	7	6.739	37	62	34	26	16.4	0.74	-
C7_93820298	7	6.739	37	62	34	26	16.4	0.74	-
C7_60001984	7	8.236	45	68	33	13	8.2	2.66	-
C7_62614036	7	8.446	27	73	37	22	13.8	2.05	-
C7_62614084	7	8.446	27	73	37	22	13.8	2.05	-
C7_17022349	7	10.264	43	61	37	18	11.3	3.07	-
C7_12694870	7	11.684	44	81	25	9	5.7	5.77	*
C7_12694886	7	11.684	44	81	25	9	5.7	5.77	*
C7_34336313	7	12.694	36	67	44	12	7.5	2.02	-
C7_34336317	7	12.694	36	67	44	12	7.5	2.02	-
C7_30593422	7	13.714	35	86	28	10	6.3	4.21	-
C7_58786269	7	15.248	35	86	32	6	3.8	2.48	-
C7_58786270	7	15.248	35	86	32	6	3.8	2.48	-
C7_53430104	7	16.964	45	82	26	6	3.8	5.51	*
C7_60016925	7	24.431	46	65	43	5	3.1	3.86	-
C7_60016929	7	24.431	46	65	43	5	3.1	3.86	-
C7_60016931	7	24.431	46	65	43	5	3.1	3.86	-
C7_60016932	7	24.431	46	65	43	5	3.1	3.86	-
C7_7747599	7	24.876	48	64	38	9	5.7	4.56	-
C7_42833002	7	25.234	47	62	42	8	5	5.16	*
C7_42833020	7	25.234	47	62	42	8	5	5.16	*
C7_42833025	7	25.234	47	62	42	8	5	5.16	*
C7_11347823	7	25.633	42	59	42	16	10.1	4.37	-
C7_11347852	7	25.633	42	59	42	16	10.1	4.37	-
C7_11347855	7	25.633	42	59	42	16	10.1	4.37	-
C7_11347866	7	25.633	42	59	42	16	10.1	4.37	-
C7_48179280	7	25.964	42	56	39	22	13.8	4.69	*
C7_48179302	7	25.964	42	56	39	22	13.8	4.69	*
C7_7310680	7	26.268	48	65	43	3	1.9	4.65	*
C7_7310686	7	26.268	48	65	43	3	1.9	4.65	*
C7_11995012	7	26.612	44	71	42	2	1.3	1.48	-
C7_11995013	7	26.612	44	71	42	2	1.3	1.48	-
C7_33571777	7	26.882	46	64	41	8	5	3.83	-
C7_49397639	7	27.208	47	68	38	6	3.8	2.95	-
C7_49397642	7	27.208	47	68	38	6	3.8	2.95	-
C7_49397667	7	27.208	47	68	38	6	3.8	2.95	-
C7_26951555	7	27.478	46	67	40	6	3.8	2.83	-
C7_42029211	7	27.696	39	66	50	4	2.5	4.97	*
C7_5698125	7	27.908	41	69	45	4	2.5	2.07	-
C7_16625001	7	28.13	46	59	32	22	13.8	5.5	*
C7_11995149	7	28.563	45	71	37	6	3.8	1.63	-
C7_11995183	7	28.563	45	71	37	6	3.8	1.63	-
C7_11995184	7	28.563	45	71	37	6	3.8	1.63	-
C7_5698407	7	28.79	41	72	43	3	1.9	0.97	-
C7_61105377	7	29.117	38	70	48	3	1.9	2.92	-
C7_61105383	7	29.117	38	70	48	3	1.9	2.92	-
C7_16625124	7	29.275	41	56	31	31	19.5	3.56	-
C7_55700314	7	29.578	45	72	41	1	0.6	1.44	-
C7_55700326	7	29.578	45	72	41	1	0.6	1.44	-
C7_55700327	7	29.578	45	72	41	1	0.6	1.44	-
C7_37800516	7	29.919	45	68	35	11	6.9	2.32	-
C7_47303806	7	30.178	47	71	36	5	3.1	2.51	-
C7_1423135	7	30.322	44	75	37	3	1.9	0.86	-
C7_1423150	7	30.322	44	75	37	3	1.9	0.86	-
C7_1423153	7	30.322	44	75	37	3	1.9	0.86	-
C7_5873602	7	30.614	45	70	35	9	5.7	2	-
C7_103249330	7	30.705	31	73	45	10	6.3	2.69	-
C7_103249351	7	30.705	31	73	45	10	6.3	2.69	-
C7_103249353	7	30.705	31	73	45	10	6.3	2.69	-
C7_8240596	7	30.89	34	74	45	6	3.8	1.75	-
C7_48178821	7	31.088	45	74	38	2	1.3	1.14	-
C7_48178850	7	31.088	45	74	38	2	1.3	1.14	-
C7_48178861	7	31.088	45	74	38	2	1.3	1.14	-
C7_48178867	7	31.088	45	74	38	2	1.3	1.14	-
C7_46545555	7	31.378	38	73	41	7	4.4	0.36	-
C7_44345642	7	31.654	44	76	36	0	0	0.92	-
C7_56631029	7	31.94	43	82	33	1	0.6	1.49	-
C7_56631051	7	31.94	43	82	33	1	0.6	1.49	-
C7_33687882	7	32.233	45	77	36	1	0.6	1.13	-
C7_48179102	7	32.564	37	65	34	23	14.5	0.4	-
C7_12733830	7	32.716	41	79	38	1	0.6	0.11	-
C7_12733846	7	32.716	41	79	38	1	0.6	0.11	-
C7_92502407	7	32.937	47	77	29	6	3.8	4.24	-
C7_92502441	7	32.937	47	77	29	6	3.8	4.24	-
C7_47303602	7	33.165	37	79	40	3	1.9	0.14	-
C7_42029115	7	33.455	30	78	47	4	2.5	3.74	-
C7_42029118	7	33.455	30	78	47	4	2.5	3.74	-
C7_53838573	7	33.634	42	80	34	0	0	0.92	-
C7_57307486	7	33.799	42	81	35	1	0.6	0.72	-
C7_75396920	7	33.959	36	82	40	1	0.6	0.43	-
C7_75396921	7	33.959	36	82	40	1	0.6	0.43	-
C7_11121787	7	34.193	38	82	38	1	0.6	0.23	-
C7_11121836	7	34.193	38	82	38	1	0.6	0.23	-
C7_37759412	7	34.405	43	80	33	3	1.9	1.38	-
C7_37759609	7	34.544	39	81	37	2	1.3	0.21	-
C7_46479251	7	34.605	45	75	36	0	0	1.27	-
C7_3888161	7	34.812	39	82	35	0	0	0.62	-
C7_3888197	7	34.812	39	82	35	0	0	0.62	-
C7_83123895	7	34.992	46	82	28	0	0	4.56	-
C7_92324822	7	35.237	41	84	33	1	0.6	1.44	-
C7_92324854	7	35.237	41	84	33	1	0.6	1.44	-
C7_92324859	7	35.237	41	84	33	1	0.6	1.44	-
C7_92324980	7	35.583	41	84	31	0	0	2.21	-
C7_92324987	7	35.583	41	84	31	0	0	2.21	-
C7_92324993	7	35.583	41	84	31	0	0	2.21	-
C7_92325020	7	35.583	41	84	31	0	0	2.21	-
C7_92325024	7	35.583	41	84	31	0	0	2.21	-
C7_92350177	7	35.827	35	86	35	0	0	1.64	-
C7_92350184	7	35.827	35	86	35	0	0	1.64	-
C7_92350196	7	35.827	35	86	35	0	0	1.64	-
C7_12718116	7	36.001	38	86	32	0	0	2.1	-
C7_12718147	7	36.001	38	86	32	0	0	2.1	-
C7_20462752	7	36.136	40	85	31	0	0	2.29	-
C7_46479289	7	36.271	42	76	38	0	0	0.31	-
C7_2455173	7	36.336	31	93	32	0	0	5.78	*
C7_83172838	7	36.485	40	86	30	0	0	2.92	-
C7_83172862	7	36.485	40	86	30	0	0	2.92	-
C7_100205408	7	36.633	34	85	36	4	2.5	1.5	-
C7_100205410	7	36.633	34	85	36	4	2.5	1.5	-
C7_57307606	7	36.757	40	87	30	2	1.3	3.11	-
C7_57307629	7	36.757	40	87	30	2	1.3	3.11	-
C7_53838454	7	36.887	39	88	31	1	0.6	2.86	-
C7_53838455	7	36.887	39	88	31	1	0.6	2.86	-
C7_88449221	7	37.045	41	87	28	0	0	4.24	-
C7_88449237	7	37.045	41	87	28	0	0	4.24	-
C7_88449265	7	37.045	41	87	28	0	0	4.24	-
C7_88449266	7	37.045	41	87	28	0	0	4.24	-
C7_37758591	7	37.176	39	88	31	1	0.6	2.86	-
C7_33789218	7	37.336	36	88	33	2	1.3	2.41	-
C7_33789225	7	37.336	36	88	33	2	1.3	2.41	-
C7_33789236	7	37.336	36	88	33	2	1.3	2.41	-
C7_56083401	7	37.444	35	89	32	0	0	3.22	-
C7_7760715	7	37.568	36	87	34	2	1.3	1.89	-
C7_7760737	7	37.568	36	87	34	2	1.3	1.89	-
C7_2456236	7	37.702	38	88	30	0	0	3.38	-
C7_28800154	7	37.853	34	88	34	3	1.9	2.56	-
C7_28800167	7	37.853	34	88	34	3	1.9	2.56	-
C7_26068295	7	37.987	38	91	28	2	1.3	5.25	*
C7_26068297	7	37.987	38	91	28	2	1.3	5.25	*
C7_26068324	7	37.987	38	91	28	2	1.3	5.25	*
C7_2455158	7	38.16	35	89	32	0	0	3.22	-
C7_17235161	7	38.299	35	91	30	0	0	4.65	*
C7_17235183	7	38.299	35	91	30	0	0	4.65	*
C7_10581013	7	38.362	36	89	31	0	0	3.42	-
C7_2541306	7	38.528	35	92	29	0	0	5.49	*
C7_2541310	7	38.528	35	92	29	0	0	5.49	*
C7_2541315	7	38.528	35	92	29	0	0	5.49	*
C7_94062731	7	38.609	33	94	31	1	0.6	5.75	*
C7_94062782	7	38.609	33	94	31	1	0.6	5.75	*
C7_5422069	7	38.696	35	92	29	0	0	5.49	*
C7_92080779	7	38.803	33	91	32	0	0	4.35	-
C7_92080823	7	38.803	33	91	32	0	0	4.35	-
C7_726343	7	38.877	33	92	31	0	0	5.08	*
C7_45865926	7	38.944	34	91	31	0	0	4.45	-
C7_28397997	7	38.999	33	93	30	0	0	5.88	*
C7_18085312	7	39.063	33	92	31	0	0	5.08	*
C7_18085334	7	39.063	33	92	31	0	0	5.08	*
C7_6637531	7	39.151	33	93	30	0	0	5.88	*
C7_6637565	7	39.151	33	93	30	0	0	5.88	*
C7_22602902	7	39.213	33	92	31	0	0	5.08	*
C7_22602909	7	39.213	33	92	31	0	0	5.08	*
C7_42250704	7	39.268	33	92	31	0	0	5.08	*
C7_26387487	7	39.381	33	93	30	0	0	5.88	*
C7_37462455	7	39.414	31	93	32	0	0	5.78	*
C7_37462463	7	39.414	31	93	32	0	0	5.78	*
C7_37462465	7	39.414	31	93	32	0	0	5.78	*
C7_56083223	7	39.514	33	93	32	1	0.6	4.97	*
C7_56083229	7	39.514	33	93	32	1	0.6	4.97	*
C7_56083263	7	39.514	33	93	32	1	0.6	4.97	*
C7_54819123	7	39.586	33	93	30	0	0	5.88	*
C7_54819139	7	39.586	33	93	30	0	0	5.88	*
C7_54819155	7	39.586	33	93	30	0	0	5.88	*
C7_34656786	7	39.647	32	92	32	0	0	5.03	*
C7_16890128	7	39.696	31	93	32	0	0	5.78	*
C7_16890130	7	39.696	31	93	32	0	0	5.78	*
C7_16890123	7	39.77	31	90	35	0	0	3.9	-
C7_26293903	7	39.846	34	91	31	0	0	4.45	-
C7_25449240	7	39.921	35	91	30	0	0	4.65	*
C7_45976973	7	40.029	35	91	30	0	0	4.65	*
C7_45976974	7	40.029	35	91	30	0	0	4.65	*
C7_45976976	7	40.029	35	91	30	0	0	4.65	*
C7_45976987	7	40.029	35	91	30	0	0	4.65	*
C7_27143503	7	40.166	34	90	32	0	0	3.74	-
C7_27143534	7	40.166	34	90	32	0	0	3.74	-
C7_27143540	7	40.166	34	90	32	0	0	3.74	-
C7_82839162	7	40.289	33	91	34	1	0.6	3.66	-
C7_82839199	7	40.289	33	91	34	1	0.6	3.66	-
C7_58842741	7	40.444	33	92	31	0	0	5.08	*
C7_58842753	7	40.444	33	92	31	0	0	5.08	*
C7_17882157	7	40.602	31	89	36	0	0	3.42	-
C7_23369065	7	40.69	35	87	34	0	0	2.09	-
C7_59841955	7	40.863	33	93	30	0	0	5.88	*
C7_59841996	7	40.863	33	93	30	0	0	5.88	*
C7_7823126	7	40.968	36	86	34	0	0	1.69	-
C7_11287066	7	41.129	31	89	38	1	0.6	3.15	-
C7_11287093	7	41.129	31	89	38	1	0.6	3.15	-
C7_52778219	7	41.257	31	88	37	0	0	3.03	-
C7_11290616	7	41.416	34	87	35	0	0	2.09	-
C7_57709780	7	41.534	34	89	33	0	0	3.12	-
C7_57709812	7	41.534	34	89	33	0	0	3.12	-
C7_74408676	7	41.599	34	85	26	14	8.8	5.19	*
C7_74408680	7	41.599	34	85	26	14	8.8	5.19	*
C7_74408704	7	41.599	34	85	26	14	8.8	5.19	*
C7_26265852	7	41.701	36	85	36	2	1.3	1.08	-
C7_58996309	7	41.83	41	86	29	0	0	3.49	-
C7_100205435	7	41.942	34	83	36	6	3.8	1.16	-
C7_37758746	7	42.113	36	86	36	1	0.6	1.24	-
C7_4304377	7	42.302	33	86	38	2	1.3	1.75	-
C7_4304384	7	42.302	33	86	38	2	1.3	1.75	-
C7_4304403	7	42.302	33	86	38	2	1.3	1.75	-
C7_4304404	7	42.302	33	86	38	2	1.3	1.75	-
C7_11367815	7	42.451	33	85	40	1	0.6	1.53	-
C7_11367819	7	42.451	33	85	40	1	0.6	1.53	-
C7_11367831	7	42.451	33	85	40	1	0.6	1.53	-
C7_68093077	7	42.625	38	82	30	9	5.7	2.16	-
C7_11680485	7	42.647	33	84	39	0	0	1.38	-
C7_11680488	7	42.647	33	84	39	0	0	1.38	-
C7_11680521	7	42.647	33	84	39	0	0	1.38	-
C7_11680526	7	42.647	33	84	39	0	0	1.38	-
C7_17397269	7	42.795	36	83	37	0	0	0.65	-
C7_17397281	7	42.795	36	83	37	0	0	0.65	-
C7_62465916	7	43.003	37	90	29	0	0	4.51	-
C7_70919522	7	43.257	34	90	32	0	0	3.74	-
C7_2150838	7	43.47	31	81	41	6	3.8	1.84	-
C7_56630612	7	43.732	37	83	36	0	0	0.65	-
C7_62041373	7	43.892	35	89	32	0	0	3.22	-
C7_12409313	7	44.063	32	82	42	0	0	1.69	-
C7_12409328	7	44.063	32	82	42	0	0	1.69	-
C7_12409330	7	44.063	32	82	42	0	0	1.69	-
C7_5707245	7	44.209	33	79	43	4	2.5	1.35	-
C7_12409413	7	44.493	32	82	42	0	0	1.69	-
C7_12409425	7	44.493	32	82	42	0	0	1.69	-
C7_44345477	7	44.728	39	77	37	6	3.8	0.06	-
C7_11680713	7	45	31	79	46	0	0	2.91	-
C7_11680742	7	45	31	79	46	0	0	2.91	-
C7_11680743	7	45	31	79	46	0	0	2.91	-
C7_47838232	7	45.212	30	81	46	2	1.3	3.42	-
C7_11287155	7	45.398	34	80	44	1	0.6	1.29	-
C7_11287177	7	45.398	34	80	44	1	0.6	1.29	-
C7_11287186	7	45.398	34	80	44	1	0.6	1.29	-
C7_11287187	7	45.398	34	80	44	1	0.6	1.29	-
C7_37638131	7	45.758	39	76	42	2	1.3	0.27	-
C7_62041225	7	46.042	37	83	36	0	0	0.65	-
C7_62041232	7	46.042	37	83	36	0	0	0.65	-
C7_75396793	7	46.246	37	76	45	1	0.6	1.04	-
C7_6661153	7	46.575	39	75	44	1	0.6	0.72	-
C7_6661181	7	46.575	39	75	44	1	0.6	0.72	-
C7_68718455	7	46.813	36	90	30	0	0	4.15	-
C7_5873492	7	47.073	40	69	39	11	6.9	0.69	-
C7_5707199	7	47.29	33	73	49	4	2.5	3.83	-
C7_34586809	7	47.542	44	71	34	10	6.3	1.67	-
C7_68790384	7	47.698	40	89	27	0	0	5.27	*
C7_68790386	7	47.698	40	89	27	0	0	5.27	*
C7_32294318	7	47.922	36	71	45	7	4.4	1.72	-
C7_12085363	7	48.127	30	80	48	1	0.6	4.13	-
C7_7179320	7	48.466	45	61	36	17	10.7	3.96	-
C7_17634768	7	48.654	44	74	39	2	1.3	0.83	-
C7_7310469	7	48.92	37	72	47	3	1.9	2.21	-
C7_7310476	7	48.92	37	72	47	3	1.9	2.21	-
C7_37637821	7	49.153	42	70	41	6	3.8	1.12	-
C7_37637844	7	49.153	42	70	41	6	3.8	1.12	-
C7_37637852	7	49.153	42	70	41	6	3.8	1.12	-
C7_47003372	7	49.464	38	70	44	7	4.4	1.42	-
C7_47003373	7	49.464	38	70	44	7	4.4	1.42	-
C7_62174080	7	49.74	40	77	41	1	0.6	0.11	-
C7_88443748	7	50.082	45	71	43	0	0	1.87	-
C7_42832649	7	50.366	43	65	42	9	5.7	2.68	-
C7_33571992	7	50.637	35	66	46	12	7.5	3.18	-
C7_60017131	7	50.848	47	66	37	9	5.7	3.49	-
C7_71981965	7	50.976	41	81	35	2	1.3	0.62	-
C7_7046745	7	51.207	46	65	42	6	3.8	3.67	-
C7_7046758	7	51.207	46	65	42	6	3.8	3.67	-
C7_11186192	7	51.508	47	65	41	6	3.8	3.93	-
C7_11186233	7	51.508	47	65	41	6	3.8	3.93	-
C7_68326696	7	51.7	35	74	44	6	3.8	1.22	-
C7_68326704	7	51.7	35	74	44	6	3.8	1.22	-
C7_68326707	7	51.7	35	74	44	6	3.8	1.22	-
C7_71981733	7	51.963	41	84	32	2	1.3	1.8	-
C7_71817328	7	52.148	43	85	28	0	0	4.14	-
C7_64653094	7	52.519	44	84	29	2	1.3	3.64	-
C7_64653096	7	52.519	44	84	29	2	1.3	3.64	-
C7_20831647	7	52.987	38	63	49	9	5.7	5.45	*
C7_92456425	7	53.612	45	63	42	9	5.7	3.96	-
C7_11185472	7	54.232	44	66	46	3	1.9	3.74	-
C7_11185480	7	54.232	44	66	46	3	1.9	3.74	-
C7_68680371	7	54.829	47	72	37	3	1.9	2.21	-
C7_68680082	7	55.55	47	69	38	5	3.1	2.71	-
C7_68680087	7	55.55	47	69	38	5	3.1	2.71	-
C7_76842190	7	56.215	39	87	30	0	0	3.12	-
C7_77814329	7	56.459	46	80	31	2	1.3	2.92	-
C7_72683855	7	56.896	43	80	33	3	1.9	1.38	-
C7_72683861	7	56.896	43	80	33	3	1.9	1.38	-
C7_70992908	7	57.638	49	70	32	8	5	4.63	*
C7_82629897	7	59.452	39	83	35	2	1.3	0.72	-
C7_82629901	7	59.452	39	83	35	2	1.3	0.72	-
C7_82629936	7	59.452	39	83	35	2	1.3	0.72	-
C7_66879368	7	61.754	35	90	31	3	1.9	3.9	-
C7_66879386	7	61.754	35	90	31	3	1.9	3.9	-
C7_79121626	7	63.062	52	72	35	0	0	5.05	*
C7_79121630	7	63.062	52	72	35	0	0	5.05	*
C7_66879335	7	63.099	38	88	30	3	1.9	3.38	-
C7_66879347	7	64.119	39	89	28	3	1.9	4.65	*
C7_80745394	7	66.195	52	69	38	0	0	5.24	*
C7_80745433	7	66.195	52	69	38	0	0	5.24	*
C7_80745564	7	68.038	49	65	43	2	1.3	5.1	*
C7_82004199	7	69.573	48	69	35	7	4.4	3.51	-
C7_82004203	7	69.573	48	69	35	7	4.4	3.51	-
C7_22433887	7	70.044	39	70	35	15	9.4	0.33	-
C7_82478734	7	70.956	43	81	32	0	0	1.78	-
C7_93706767	7	71.113	34	70	46	9	5.7	2.59	-
C7_81095443	7	72.962	51	74	33	1	0.6	4.73	*
C7_81095447	7	72.962	51	74	33	1	0.6	4.73	*
C7_82031799	7	73.672	49	71	35	4	2.5	3.62	-
C7_82031806	7	73.672	49	71	35	4	2.5	3.62	-
C7_82004368	7	74.566	46	73	35	5	3.1	1.99	-
C7_29324639	7	75.984	40	63	33	23	14.5	1.46	-
C7_29324668	7	75.984	40	63	33	23	14.5	1.46	-
C7_62500940	7	76.973	37	56	37	29	18.2	2.49	-
C7_62500963	7	76.973	37	56	37	29	18.2	2.49	-
C7_62500971	7	76.973	37	56	37	29	18.2	2.49	-
C7_86188878	7	82.799	50	70	39	0	0	3.79	-
C7_86188882	7	82.799	50	70	39	0	0	3.79	-
C7_86188819	7	84.079	51	72	36	0	0	4.25	-
C7_89010589	7	90.489	51	67	40	1	0.6	5.18	*
C7_89010607	7	90.489	51	67	40	1	0.6	5.18	*
C7_83373670	7	96.092	44	68	28	19	11.9	3.77	-
C7_102493031	7	100.42	52	74	33	0	0	5.3	*
C7_102493071	7	100.42	52	74	33	0	0	5.3	*
C7_102493074	7	100.42	52	74	33	0	0	5.3	*
C7_94062589	7	101.402	30	75	40	14	8.8	1.55	-
C7_94062617	7	101.402	30	75	40	14	8.8	1.55	-
C7_103778915	7	114.887	40	76	28	15	9.4	2.44	-
C7_103778960	7	114.887	40	76	28	15	9.4	2.44	-
C7_103778965	7	114.887	40	76	28	15	9.4	2.44	-
C7_103778972	7	114.887	40	76	28	15	9.4	2.44	-
C8_130673900	8	0	42	63	37	17	10.7	2.15	-
C8_130673946	8	0	42	63	37	17	10.7	2.15	-
C8_3244599	8	0.772	37	88	28	6	3.8	4.52	-
C8_3244631	8	0.772	37	88	28	6	3.8	4.52	-
C8_89500435	8	12.255	41	78	28	12	7.5	2.85	-
C8_89500442	8	12.255	41	78	28	12	7.5	2.85	-
C8_89500454	8	12.255	41	78	28	12	7.5	2.85	-
C8_35187941	8	19.571	41	77	28	13	8.2	2.75	-
C8_35187966	8	19.571	41	77	28	13	8.2	2.75	-
C8_139852804	8	22.454	43	58	30	28	17.6	4.3	-
C8_139852805	8	22.454	43	58	30	28	17.6	4.3	-
C8_139852806	8	22.454	43	58	30	28	17.6	4.3	-
C8_139852817	8	22.454	43	58	30	28	17.6	4.3	-
C8_139852819	8	22.454	43	58	30	28	17.6	4.3	-
C8_144370075	8	22.745	39	53	37	30	18.9	4.16	-
C8_123284536	8	24.315	30	71	37	21	13.2	0.83	-
C8_123284539	8	24.315	30	71	37	21	13.2	0.83	-
C8_56539760	8	25.051	43	64	31	21	13.2	2.81	-
C8_143991682	8	26.093	37	63	43	16	10.1	2.52	-
C8_143991684	8	26.093	37	63	43	16	10.1	2.52	-
C8_143991686	8	26.093	37	63	43	16	10.1	2.52	-
C8_143991714	8	26.093	37	63	43	16	10.1	2.52	-
C8_85990126	8	27.476	38	68	40	13	8.2	0.74	-
C8_55328277	8	28.51	38	71	28	22	13.8	1.64	-
C8_55328321	8	28.51	38	71	28	22	13.8	1.64	-
C8_66678828	8	30.589	38	77	26	18	11.3	3.24	-
C8_66678831	8	30.589	38	77	26	18	11.3	3.24	-
C8_66678883	8	30.589	38	77	26	18	11.3	3.24	-
C8_96191022	8	31.182	26	69	33	31	19.5	1.55	-
C8_63325750	8	31.579	44	72	30	13	8.2	2.71	-
C8_63325763	8	31.579	44	72	30	13	8.2	2.71	-
C8_91566403	8	33.96	39	84	31	5	3.1	2.1	-
C8_91566415	8	33.96	39	84	31	5	3.1	2.1	-
C8_40223217	8	34.587	30	76	40	13	8.2	1.62	-
C8_40223223	8	34.587	30	76	40	13	8.2	1.62	-
C8_110099638	8	34.791	42	75	25	17	10.7	4.52	-
C8_127149355	8	35.993	31	87	33	8	5	3.56	-
C8_127149356	8	35.993	31	87	33	8	5	3.56	-
C8_127149370	8	35.993	31	87	33	8	5	3.56	-
C8_127149372	8	35.993	31	87	33	8	5	3.56	-
C8_127149397	8	35.993	31	87	33	8	5	3.56	-
C8_127149399	8	35.993	31	87	33	8	5	3.56	-
C8_141213298	8	38.065	39	81	36	3	1.9	0.35	-
C8_141213323	8	38.065	39	81	36	3	1.9	0.35	-
C8_17194521	8	42.451	51	72	36	0	0	4.25	-
C8_17194348	8	43.319	51	72	36	0	0	4.25	-
C8_17194353	8	43.319	51	72	36	0	0	4.25	-
C8_17194358	8	43.319	51	72	36	0	0	4.25	-
C8_75420801	8	43.849	42	82	28	7	4.4	3.53	-
C8_6420952	8	43.989	37	62	39	21	13.2	1.48	-
C8_6420987	8	43.989	37	62	39	21	13.2	1.48	-
C8_6420989	8	43.989	37	62	39	21	13.2	1.48	-
C8_6421008	8	43.989	37	62	39	21	13.2	1.48	-
C8_7478020	8	44.865	47	74	35	0	0	2.26	-
C8_143700771	8	51.001	39	63	46	11	6.9	3.93	-
C8_88630757	8	51.481	44	66	46	3	1.9	3.74	-
C8_84240947	8	52.042	50	68	39	2	1.3	4.35	-
C8_98903488	8	52.306	45	67	44	3	1.9	3.12	-
C8_131406395	8	52.471	42	78	27	12	7.5	3.61	-
C8_131406396	8	52.471	42	78	27	12	7.5	3.61	-
C8_131406397	8	52.471	42	78	27	12	7.5	3.61	-
C8_131406402	8	52.471	42	78	27	12	7.5	3.61	-
C8_131406403	8	52.471	42	78	27	12	7.5	3.61	-
C8_131406441	8	52.471	42	78	27	12	7.5	3.61	-
C8_131406450	8	52.471	42	78	27	12	7.5	3.61	-
C8_112291050	8	52.614	47	66	40	6	3.8	3.52	-
C8_112291051	8	52.614	47	66	40	6	3.8	3.52	-
C8_151070031	8	53.013	47	75	36	1	0.6	1.94	-
C8_151070042	8	53.013	47	75	36	1	0.6	1.94	-
C8_151070053	8	53.013	47	75	36	1	0.6	1.94	-
C8_88630558	8	53.383	41	70	46	2	1.3	2.16	-
C8_88630574	8	53.383	41	70	46	2	1.3	2.16	-
C8_88630596	8	53.383	41	70	46	2	1.3	2.16	-
C8_88630602	8	53.383	41	70	46	2	1.3	2.16	-
C8_88630607	8	53.383	41	70	46	2	1.3	2.16	-
C8_123457056	8	53.645	46	71	42	0	0	2.02	-
C8_123457063	8	53.645	46	71	42	0	0	2.02	-
C8_123457082	8	53.645	46	71	42	0	0	2.02	-
C8_152667058	8	53.869	41	78	39	1	0.6	0.08	-
C8_143475566	8	54.048	48	70	38	3	1.9	2.92	-
C8_143475602	8	54.048	48	70	38	3	1.9	2.92	-
C8_152474508	8	54.117	43	69	38	9	5.7	1.29	-
C8_125703746	8	54.335	48	69	36	6	3.8	3.35	-
C8_125703776	8	54.335	48	69	36	6	3.8	3.35	-
C8_75386857	8	54.549	47	72	39	1	0.6	2.05	-
C8_75386882	8	54.549	47	72	39	1	0.6	2.05	-
C8_75386902	8	54.549	47	72	39	1	0.6	2.05	-
C8_91586565	8	54.696	42	74	36	7	4.4	0.58	-
C8_149041580	8	55.001	44	75	38	2	1.3	0.77	-
C8_121814483	8	55.154	45	74	39	1	0.6	1.09	-
C8_121814505	8	55.154	45	74	39	1	0.6	1.09	-
C8_142954014	8	55.368	48	73	36	2	1.3	2.61	-
C8_142954017	8	55.368	48	73	36	2	1.3	2.61	-
C8_149041441	8	55.675	43	72	41	3	1.9	0.97	-
C8_149041446	8	55.675	43	72	41	3	1.9	0.97	-
C8_149041465	8	55.675	43	72	41	3	1.9	0.97	-
C8_149041473	8	55.675	43	72	41	3	1.9	0.97	-
C8_135964330	8	55.828	46	73	37	0	0	1.68	-
C8_135964369	8	55.828	46	73	37	0	0	1.68	-
C8_104948896	8	55.996	45	75	37	2	1.3	1.13	-
C8_104948942	8	55.996	45	75	37	2	1.3	1.13	-
C8_26924130	8	56.15	39	89	28	0	0	4.65	*
C8_138224738	8	56.203	44	74	38	3	1.9	0.87	-
C8_107669214	8	56.323	49	73	35	2	1.3	3.27	-
C8_98103233	8	56.489	47	75	34	0	0	2.4	-
C8_98103245	8	56.489	47	75	34	0	0	2.4	-
C8_107669441	8	56.733	48	76	34	1	0.6	2.71	-
C8_126324824	8	56.94	44	74	38	0	0	0.87	-
C8_126324844	8	56.94	44	74	38	0	0	0.87	-
C8_126324848	8	56.94	44	74	38	0	0	0.87	-
C8_84240771	8	57.098	44	76	38	1	0.6	0.68	-
C8_84240803	8	57.098	44	76	38	1	0.6	0.68	-
C8_121381568	8	57.255	42	77	36	4	2.5	0.47	-
C8_121381596	8	57.255	42	77	36	4	2.5	0.47	-
C8_121381608	8	57.255	42	77	36	4	2.5	0.47	-
C8_104949118	8	57.45	42	78	38	1	0.6	0.23	-
C8_104949133	8	57.45	42	78	38	1	0.6	0.23	-
C8_124824231	8	57.548	44	76	35	4	2.5	1.1	-
C8_111737717	8	57.714	43	78	35	0	0	0.82	-
C8_111737719	8	57.714	43	78	35	0	0	0.82	-
C8_111737736	8	57.714	43	78	35	0	0	0.82	-
C8_111737738	8	57.714	43	78	35	0	0	0.82	-
C8_100489811	8	57.859	44	76	29	10	6.3	3.08	-
C8_102295813	8	58.003	42	78	36	0	0	0.46	-
C8_102295852	8	58.003	42	78	36	0	0	0.46	-
C8_102295859	8	58.003	42	78	36	0	0	0.46	-
C8_124824363	8	58.174	48	79	31	1	0.6	3.66	-
C8_124824366	8	58.174	48	79	31	1	0.6	3.66	-
C8_124824377	8	58.174	48	79	31	1	0.6	3.66	-
C8_127743380	8	58.308	47	77	32	0	0	2.91	-
C8_142991827	8	58.454	40	79	37	0	0	0.14	-
C8_102344108	8	58.56	47	78	33	1	0.6	2.51	-
C8_145742190	8	58.738	43	80	35	1	0.6	0.84	-
C8_145742233	8	58.738	43	80	35	1	0.6	0.84	-
C8_148962338	8	58.873	47	80	31	1	0.6	3.27	-
C8_116311390	8	58.993	44	82	32	1	0.6	2.05	-
C8_116311416	8	58.993	44	82	32	1	0.6	2.05	-
C8_148962231	8	59.087	45	80	31	0	0	2.62	-
C8_112017285	8	59.18	44	80	34	1	0.6	1.29	-
C8_112017298	8	59.18	44	80	34	1	0.6	1.29	-
C8_112017339	8	59.18	44	80	34	1	0.6	1.29	-
C8_112017340	8	59.18	44	80	34	1	0.6	1.29	-
C8_121811613	8	59.324	41	78	37	0	0	0.21	-
C8_143444282	8	59.466	46	81	29	0	0	3.94	-
C8_143444283	8	59.466	46	81	29	0	0	3.94	-
C8_143444284	8	59.466	46	81	29	0	0	3.94	-
C8_143444307	8	59.466	46	81	29	0	0	3.94	-
C8_128565275	8	59.542	45	81	32	1	0.6	2.24	-
C8_128565288	8	59.542	45	81	32	1	0.6	2.24	-
C8_128565315	8	59.542	45	81	32	1	0.6	2.24	-
C8_117473630	8	59.667	44	80	32	0	0	1.95	-
C8_117473642	8	59.667	44	80	32	0	0	1.95	-
C8_91684496	8	59.79	41	81	35	2	1.3	0.62	-
C8_128565124	8	59.853	44	81	33	1	0.6	1.63	-
C8_128565138	8	59.853	44	81	33	1	0.6	1.63	-
C8_128565147	8	59.853	44	81	33	1	0.6	1.63	-
C8_121451180	8	59.962	43	81	32	3	1.9	1.78	-
C8_121451188	8	59.962	43	81	32	3	1.9	1.78	-
C8_121451206	8	59.962	43	81	32	3	1.9	1.78	-
C8_138203104	8	60.075	41	85	32	1	0.6	1.94	-
C8_91627445	8	60.077	38	77	34	10	6.3	0.38	-
C8_138765494	8	60.13	43	81	32	0	0	1.78	-
C8_138765497	8	60.13	43	81	32	0	0	1.78	-
C8_138765524	8	60.13	43	81	32	0	0	1.78	-
C8_75391126	8	60.204	45	81	30	0	0	3.12	-
C8_147244863	8	60.303	47	80	29	0	0	4.26	-
C8_98047687	8	60.435	45	81	30	0	0	3.12	-
C8_98047698	8	60.435	45	81	30	0	0	3.12	-
C8_147248082	8	60.548	41	84	31	0	0	2.21	-
C8_138104047	8	60.665	43	82	31	0	0	2.26	-
C8_116293454	8	60.732	42	82	32	0	0	1.69	-
C8_96132846	8	60.791	40	83	33	0	0	1.27	-
C8_96132851	8	60.791	40	83	33	0	0	1.27	-
C8_121811694	8	60.871	42	84	30	0	0	2.77	-
C8_121811705	8	60.871	42	84	30	0	0	2.77	-
C8_121811711	8	60.871	42	84	30	0	0	2.77	-
C8_75382154	8	60.964	42	82	32	0	0	1.69	-
C8_91632661	8	60.996	41	85	30	0	0	2.81	-
C8_135683086	8	61.013	40	87	29	0	0	3.63	-
C8_135683102	8	61.013	40	87	29	0	0	3.63	-
C8_102295968	8	61.031	41	85	30	0	0	2.81	-
C8_147244828	8	61.08	40	86	30	0	0	2.92	-
C8_147244851	8	61.08	40	86	30	0	0	2.92	-
C8_147244855	8	61.08	40	86	30	0	0	2.92	-
C8_147244858	8	61.08	40	86	30	0	0	2.92	-
C8_147244752	8	61.144	39	85	32	0	0	1.88	-
C8_98834449	8	61.24	40	83	33	0	0	1.27	-
C8_135538463	8	61.303	40	83	33	0	0	1.27	-
C8_117473488	8	61.391	42	82	32	0	0	1.69	-
C8_117473499	8	61.391	42	82	32	0	0	1.69	-
C8_116311310	8	61.512	44	82	30	0	0	2.92	-
C8_121814276	8	61.579	43	80	35	1	0.6	0.84	-
C8_72782726	8	61.74	44	83	29	0	0	3.53	-
C8_68102734	8	61.885	42	83	31	0	0	2.19	-
C8_68102864	8	61.943	44	82	30	0	0	2.92	-
C8_147658835	8	62.079	46	79	31	0	0	2.91	-
C8_147658838	8	62.079	46	79	31	0	0	2.91	-
[truncated: 1,113 more rows]
