# Supplementary material for: Unraveling the Sclerotinia Basal Stalk Rot Resistance Derived From Wild Helianthus argophyllus Using a High-Density Single Nucleotide Polymorphism Linkage Map
Source: Front Plant Sci. 2021 Feb 3;11:617920. doi: 10.3389/fpls.2020.617920 (PMC7886805; doi:10.3389/fpls.2020.617920)
Supplement: Supplementary Table 3 — QTL associated with Sclerotinia basal stalk rot (BSR) disease incidence (DI), area under disease progress curve (AUDPC) and BSR disease rating (DR) in an advanced backcross population derived from the cross of HA 89 and wild annual sunflower species, H. argophyllus evaluated in the field and greenhouse. [file Table_3.XLSX]

## Sheet: Sheet1
Table S3. QTL associated with Sclerotinia basal stalk rot (BSR) disease incidence (DI), area under disease progress curve (AUDPC) and BSR disease rating (DR) in an
	advanced backcross population derived from the cross of HA 89 and wild annual sunflower species, H. argophyllus evaluated in the field and greenhouse
QTL	Trait†	LG	Pos (cM)	LOD	Left marker	Pos (cM)	Right marker	Pos (cM)	R2	Additive	Resistance allele
Qbsr-2.1	DI Carr2019	2	73	4.45	C2_157528095	71.943	C2_174979149	75.028	14.3	-11.09	HA 89
	AUDPC		73	6.01					10.5	-114.87
Qbsr-2.2	AUDPC	2	87	5.86	C2_141062679	84.214	C2_107610652	87.455	10.9	-26	HA 89
	DR		87	4.39					10.2	0.39
Qbsr-5.1	AUDPC	5	22	4.53	C5_44061240	21.682	C5_55959009	21.841	14.4	-54.26	HA 89
	DR		22	5.33					15	1.01
Qbsr-6.1	DI Carr2019	6	16	7.14	C6_6832430	8.466	C6_5701209	18.168	19.5	13.83	H. argophyllus
	DI Combined		16	12.49					10.8	7.03
Qbsr-6.2	DI Carr2017	6	24.2	7.78	C6_78289542	24.598	C6_83474175	31.117	17.3	12.46	H. argophyllus
Qbsr-6.3	DI Carr2018	6	42	6.47	C6_5702968	41.889	C6_6001429	44.276	7.8	4.46	H. argophyllus
	DI Combined		42	10.75					12.4	6.21
Qbsr-7.1	AUDPC	7	31.9	5.8	C7_56631029	31.94	C7_33687882	32.233	12.2	-125.01	HA 89
	DR		31.9	5.1					13.9	1.06
Qbsr-7.2	AUDPC	7	43	5.52	C7_62465916	43.003	C7_62041373	43.892	7.5	-141.69	HA 89
	DR		43	4.81					4.5	0.07
	DI Combined		43	9.55					7.5	-3.19
Qbsr-7.3	AUDPC	7	82	4.93	C7_62500940	76.973	C7_86188878	82.799	6.1	53.25	H. argophyllus
	DR		82	15.78					7.1	-0.56
Qbsr-8.1	AUDPC	8	30.5	4.28	C8_55328277	28.51	C8_66678828	30.589	16.7	95.35	H. argophyllus
	DR		30.5	6.67					19.7	-1.07
Qbsr-8.2	DI Carr2017	8	67.7	8.77	C8_65495308	64.914	C8_71401840	67.907	14.3	12.42	H. argophyllus
	AUDPC		67.7	5.44					6.7	99.93
	DR		67.7	6.44					8.6	-0.97
Qbsr-9.2	DI Carr2018	9	79.6	5.51	C9_176724553	76.609	C9_176603426	80.52	13.5	9.6	H. argophyllus
	DI Combined		79.6	5.02					18.3	6.76
Qbsr-9.3	AUDPC	9	136.7	5.028	C9_110189180	134.816	C9_173918742	137.294	17.3	118.99	H. argophyllus
	DR		136.7	9.76					14.8	-1.17
Qbsr-10.2	DR	10	68	6.33	C10_180847742	68.434	C10_111029421	70.484	16.3	0.78	HA 89
	DI Carr2017		69.4	5.58					10.5	-10.13
Qbsr-11.2	DI Carr2018	11	96	12.28	C11_26402705	82.99	C11_39839617	97.517	11.3	-7.53	HA 89
Qbsr-14.1	DI Combined	14	74	3.34	C14_38960647	73.935	C14_92847867	75.085	7.5	2.96	H. argophyllus
	DI Carr2019		73.9	5.73					22.6	13.28
	DI Carr2018		74	6.83					5.5	7.09
Qbsr-16.2	DI Carr2018	16	42.3	19.13	C16_156300872	42.275	C16_146472171	45.324	19.1	4.47	H. argophyllus
	DR		43	3.28					10.7	-0.66
	AUDPC		43	5.71					12.3	54.34
Qbsr-16.3	DI Carr2017	16	51	6.37	C16_154054455	53.536	C16_146426614	57.257	16.9	6.13	H. argophyllus
	DI Combined		56.8	4.04					3.14	1.48
Qbsr-16.4	DI Carr2018	16	79.6	5.87	C16_75842994	79.601	C16_63009695	81	13	11.6	H. argophyllus
	DI Carr2017		79.6	6.32					19.5	2.81
	DI Combined		79.6	6.97					16.4	10.31
Qbsr-17.2	AUDPC	17	10.4	3.11	C17_99950806	9.412	C17_68503520	13.695	17.3	96.49	H. argophyllus
	DR		11.4	6.1					17	-0.89
Qbsr-17.3	DI Carr2017	17	36	4.88	C17_171247454	36.98	C17_174047539	40.469	15.5	-8.19	HA 89
	DI Carr2018		36	5.26					16.6	-7.77
	AUDPC		38	13.94					19.4	-52.28
	DR		38	3.35					8.7	0.12
† DI was measured in the field in Carrington, ND during 2017-2019 and subject to individual environment and combined analyses; AUDPC and DR was measured in the greenhouse in 2019.
QTL—quantitative trait loci; LG—linkage group; LOD—log of odds; Pos—position; R2—phenotypic variation explained.
